# Supplementary material for: Thioether and Ether Furofuran Lignans: Semisynthesis, Reaction Mechanism, and Inhibitory Effect against α-Glucosidase and Free Radicals
Source: MDPI journal article supplement (doi:10.3390/molecules27249001), 2022-12-17
Supplement: s1 [file s1]

## Supplementary materials

### **Thioether and ether furofuran lignans: Semisynthesis, reaction mechanism and inhibitory effect against $\alpha$ -glucosidase and free radicals**

Wisuttaya Worawalai, Nantaporn Surachaitanawat, Phonpimon Khongchai, Viwat Vchirawongkwin, Thammarat Aree, Preecha Phuwapraisirisan \*

*Department of Chemistry, Faculty of Science, Chulalongkorn University, Bangkok 10330, Thailand*

\* *Correspondence: preecha.p@chula.ac.th*

**Contents**

|                                                                                                                              |    |
|------------------------------------------------------------------------------------------------------------------------------|----|
| Optimization of reaction condition.....                                                                                      | 3  |
| Structures and NMR data for the synthesized compounds.....                                                                   | 4  |
| NMR spectrum for the synthesized compounds.....                                                                              | 14 |
| Crystal data and refinement parameters of compounds <b>2<math>\alpha</math>-7f</b> and <b>2<math>\beta</math>-7fBr</b> ..... | 47 |

**Table S1.** Optimization of Reaction Conditions<sup>a</sup>.

| entry | catalyst (10 mol %)                | conditions   | yield (%) <sup>b</sup> |
|-------|------------------------------------|--------------|------------------------|
| 1     | AlCl <sub>3</sub>                  | rt, 2 h      | 96                     |
| 2     | AlCl <sub>3</sub>                  | 70 °C, 1.5 h | 96                     |
| 3     | BF <sub>3</sub> ·Et <sub>2</sub> O | rt, 2 h      | 95                     |
| 4     | BF <sub>3</sub> ·Et <sub>2</sub> O | 70 °C, 1.5 h | 96                     |
| 5     | CH <sub>3</sub> CO <sub>2</sub> H  | rt, 24 h     | no reaction            |
| 6     | CH <sub>3</sub> CO <sub>2</sub> H  | 70 °C, 24 h  | no reaction            |
| 7     | HCl                                | rt, 2 h      | 95                     |
| 8     | HCl                                | 70 °C, 1.5 h | 95                     |
| 9     | CF <sub>3</sub> CO <sub>2</sub> H  | rt, 2 h      | 96                     |
| 10    | CF <sub>3</sub> CO <sub>2</sub> H  | 70 °C, 1.5 h | 96                     |
| 11    | Amberlyst-15 <sup>c</sup>          | rt, 2 h      | 98                     |
| 12    | Amberlyst-15 <sup>c</sup>          | 70 °C, 1.5 h | 98                     |

<sup>a</sup>Reaction conditions: **5** (1.0 mmol), CH<sub>3</sub>OH (2.0 mmol), and catalyst were mixed in CH<sub>3</sub>CN (0.1 M for **5**). The reaction mixture was stirred in the indicated conditions. <sup>b</sup>Isolated yield. <sup>c</sup>200 mg/mmol of **5**.

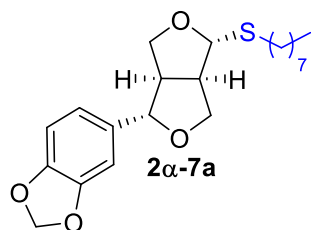

1-Octanethiol samin (**2α-7a**). Yield: quant., yellow oil;  $^1\text{H}$  NMR (400 MHz,  $\text{CDCl}_3$ )  $\delta$  6.86 – 6.75 (m, 3H, H-2', H-5' and H-6'), 5.95 (s, 2H, H-7'), 5.38 (s, 1H, H-2), 4.38 (m, 2H, H-6 and H-8), 4.15 (dd,  $J = 9.3, 5.9$  Hz, 1H, H-4), 3.83 (d,  $J = 9.4$  Hz, 1H, H-4), 3.60 (m, 1H, H-8), 2.96 (m, 1H, H-1), 2.77 (m, 1H, H-5), 2.75 (m, 1H, H-1''), 2.55 (m, 1H, H-1''), 1.62 – 1.27 (m, 12H, H- $\text{CH}_2$ ), 0.88 (t, 3H, H- $\text{CH}_3$ );  $^{13}\text{C}$  NMR (100 MHz,  $\text{CDCl}_3$ )  $\delta$  148.0, 147.3, 134.6, 119.6, 108.2, 106.6, 101.1, 89.0, 86.9, 73.4, 68.3, 53.3, 53.2, 31.8, 31.1, 29.8, 29.2, 29.1, 29.0, 22.6, 14.0; HRESIMS  $m/z$  401.1759  $[\text{M}+\text{Na}]^+$  (calcd for  $\text{C}_{21}\text{H}_{30}\text{NaO}_4\text{S}$ , 401.1763).

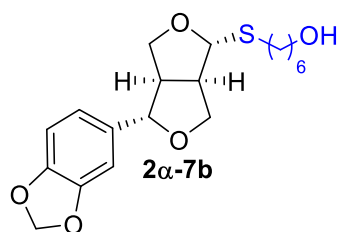

6-Mercapto-1-hexanol samin (**2α-7b**). Yield: quant., yellow oil;  $^1\text{H}$  NMR (400 MHz,  $\text{CDCl}_3$ )  $\delta$  6.86 – 6.75 (m, 3H), 5.94 (s, 2H), 5.26 (s, 1H), 4.42 – 4.32 (m, 2H), 4.12 (dd,  $J = 9.2, 6.0$  Hz, 1H), 3.84 (d,  $J = 9.4$  Hz, 1H), 3.65 – 3.52 (m, 3H), 2.97 (m, 1H), 2.81 – 2.73 (m, 1H), 2.67 (m, 1H), 2.55 (m, 1H), 1.70 – 1.25 (m, 8H);  $^{13}\text{C}$  NMR (100 MHz,  $\text{CDCl}_3$ )  $\delta$  148.0, 147.3, 134.5, 119.6, 108.2, 106.6, 101.1, 89.0, 86.9, 73.4, 68.3, 62.9, 53.3, 53.2, 32.6, 31.0, 29.7, 28.6, 25.3; HRESIMS  $m/z$  389.1395  $[\text{M}+\text{Na}]^+$  (calcd for  $\text{C}_{19}\text{H}_{26}\text{NaO}_5\text{S}$ , 389.1399).

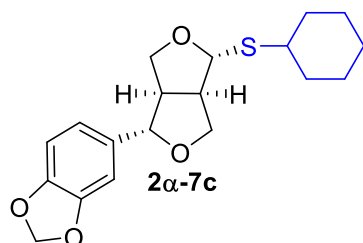

Cyclohexanethiol samin (**2α-7c**). Yield: 95%, yellow oil;  $^1\text{H}$  NMR (400 MHz,  $\text{CDCl}_3$ )  $\delta$  6.86 – 6.75 (m, 3H), 5.95 (s, 2H), 5.38 (s, 1H), 4.42 – 4.35 (m, 2H), 4.15 (dd,  $J = 9.3, 5.9$  Hz, 1H), 3.83 (d,  $J = 9.4$  Hz, 1H), 3.60 (m, 1H), 2.96 (m, 1H), 2.76 (m, 1H), 2.12 – 1.17 (m, 11H);  $^{13}\text{C}$  NMR (100 MHz,  $\text{CDCl}_3$ )  $\delta$  148.0, 147.3, 134.6, 119.6, 108.8, 106.6, 101.1, 87.9, 86.9, 73.5, 68.2, 53.4, 53.3, 43.4, 34.0, 33.8, 26.1, 26.0, 25.8; HRESIMS  $m/z$  371.1297  $[\text{M}+\text{Na}]^+$  (calcd for  $\text{C}_{19}\text{H}_{24}\text{NaO}_4\text{S}$ , 371.1293).

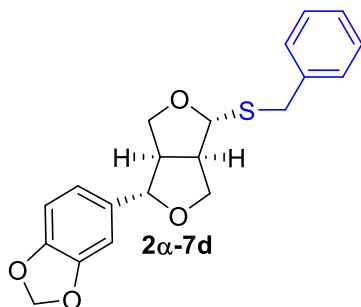

*Benzyl mercaptan samin (2α-7d)*. Yield: 93%, yellow oil;  $^1\text{H}$  NMR (400 MHz,  $\text{CDCl}_3$ )  $\delta$  7.37 – 7.24 (m, 5H), 6.86 – 6.76 (m, 3H), 5.95 (s, 2H), 5.12 (s, 1H), 4.37 – 4.31 (m, 2H), 4.18 (dd,  $J$  = 9.4, 5.9 Hz, 1H), 3.91 – 3.85 (m, 2H), 3.71 (d,  $J$  = 13.5 Hz, 1H), 3.51 (dd,  $J$  = 8.9, 7.4 Hz, 1H), 2.96 (m, 1H), 2.79 (m, 1H);  $^{13}\text{C}$  NMR (100 MHz,  $\text{CDCl}_3$ )  $\delta$  148.0, 147.4, 138.2, 134.5, 128.9, 128.6, 127.0, 119.6, 108.2, 106.6, 101.1, 87.5, 86.9, 73.4, 68.4, 53.3, 52.8, 34.8; HRESIMS  $m/z$  379.0974  $[\text{M}+\text{Na}]^+$  (calcd for  $\text{C}_{20}\text{H}_{20}\text{NaO}_4\text{S}$ , 379.0980).

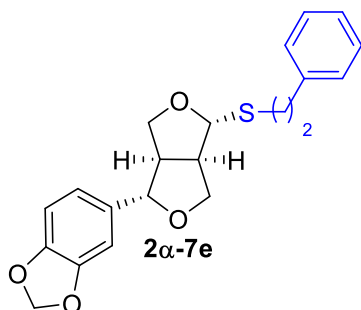

*Phenylethyl mercaptan samin (2α-7e)*. Yield: 96%, yellow oil;  $^1\text{H}$  NMR (400 MHz,  $\text{CDCl}_3$ )  $\delta$  7.34 – 7.20 (m, 5H), 6.87 – 6.76 (m, 3H), 5.95 (s, 2H), 5.23 (s, 1H), 4.40 – 4.35 (m, 2H), 4.12 (dd,  $J$  = 9.4, 5.9 Hz, 1H), 3.85 (d,  $J$  = 9.4 Hz, 1H), 3.56 (m, 1H), 3.01 – 2.73 (m, 5H);  $^{13}\text{C}$  NMR (100 MHz,  $\text{CDCl}_3$ )  $\delta$  148.2, 147.5, 140.6, 134.7, 128.7, 128.6, 126.5, 119.8, 108.3, 106.7, 101.2, 89.3, 87.0, 73.6, 68.4, 53.5, 53.3, 36.6, 32.6; HRESIMS  $m/z$  393.1149  $[\text{M}+\text{Na}]^+$  (calcd for  $\text{C}_{21}\text{H}_{22}\text{NaO}_4\text{S}$ , 393.1136).

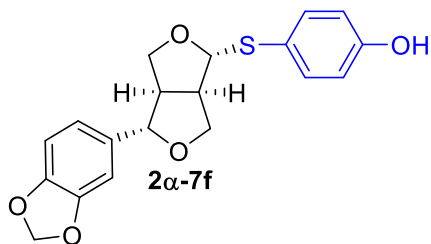

*4-Mercaptophenol samin (2α-7f)*. Yield: 99%, white powder;  $^1\text{H}$  NMR (400 MHz,  $\text{CDCl}_3$ )  $\delta$  7.38 (d,  $J$  = 8.5 Hz, 2H), 6.87 – 6.71 (m, 5H), 5.95 (s, 2H), 5.37 (s, 1H), 4.44 (t,  $J$  = 8.7 Hz, 1H), 4.37 (d,  $J$  = 7.5 Hz, 1H), 4.28 (dd,  $J$  = 9.4, 5.9 Hz, 1H), 3.93 (d,  $J$  = 9.4 Hz, 1H), 3.61 (dd,  $J$  = 8.9, 7.1 Hz, 1H), 3.11 (m, 1H), 2.83 (m, 1H);  $^{13}\text{C}$  NMR (100 MHz,  $\text{CDCl}_3$ )  $\delta$  156.1, 148.2, 147.6, 135.2, 134.4, 133.1, 119.9, 116.2, 108.4, 106.7, 101.2, 93.2, 87.0, 73.5, 68.7, 53.3, 53.0; HRESIMS  $m/z$  381.0771  $[\text{M}+\text{Na}]^+$  (calcd for  $\text{C}_{19}\text{H}_{18}\text{NaO}_5\text{S}$ , 381.0773).

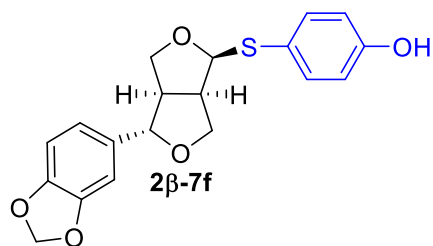

**4-Mercaptophenol samin (2β-7f).** Yield: 34%, white powder;  $^1\text{H}$  NMR (400 MHz,  $\text{CDCl}_3$ )  $\delta$  7.43 (d,  $J$  = 8.6 Hz, 2H), 6.86 – 6.75 (m, 5H), 5.95 (s, 2H), 5.09 (d,  $J$  = 6.1 Hz, 1H), 4.54 (d,  $J$  = 6.7 Hz, 1H), 4.21 (dd,  $J$  = 9.4, 8.1 Hz, 1H), 4.06-3.99 (m, 2H), 3.81 (dd,  $J$  = 9.5, 6.7 Hz, 1H), 3.36 (m, 1H), 2.84 (m, 1H);  $^{13}\text{C}$  NMR (100 MHz,  $\text{CDCl}_3$ )  $\delta$  155.9, 148.1, 147.4, 134.8, 134.6, 125.6, 119.7, 116.3, 108.3, 106.7, 101.2, 90.9, 86.8, 70.6, 69.2, 54.0, 50.7; HRESIMS  $m/z$  381.0770  $[\text{M}+\text{Na}]^+$  (calcd for  $\text{C}_{19}\text{H}_{18}\text{NaO}_5\text{S}$ , 381.0773).

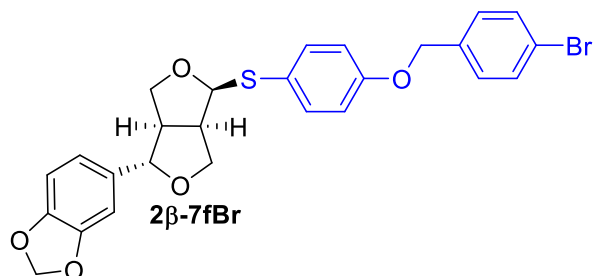

**Preparation of 2β-7fBr:** A solution of **2β-7f** (1 mmol) in acetonitrile (15 mL) was treated with 4-bromobenzylbromide (1 mmol) and  $\text{K}_2\text{CO}_3$  (3 mmol). After stirring at 70°C for 4 h, the reaction mixture was evaporated to dryness and purified by silica gel column (10% EtOAc-hexane) to give the product as a white solid. This product was further recrystallized using MeOH to afford **2β-7fBr** (80%) as a white crystal;  $^1\text{H}$  NMR (400 MHz,  $\text{CDCl}_3$ )  $\delta$  7.50 (dd,  $J$  = 11.3, 8.6 Hz, 4H), 7.29 (d,  $J$  = 8.2 Hz, 2H), 6.91 (d,  $J$  = 8.7 Hz, 2H), 6.85 (s, 1H), 6.82-6.76 (m, 2H), 5.95 (s, 2H), 5.11 (d,  $J$  = 6.1 Hz, 1H), 5.00 (s, 2H), 4.54 (d,  $J$  = 6.7 Hz, 1H), 4.21 (t,  $J$  = 8.7 Hz, 1H), 4.02 (dd,  $J$  = 17.2, 9.7 Hz, 2H), 3.81 (dd,  $J$  = 9.4, 6.7 Hz, 1H), 3.38 (dd,  $J$  = 15.7, 8.0 Hz, 1H), 2.88-2.82 (m, 1H); HRESIMS  $m/z$  549.0349, 551.0329  $[\text{M}+\text{Na}]^+$  (calcd for  $\text{C}_{26}\text{H}_{23}^{79}\text{BrNaO}_5\text{S}$ , 549.0347 and  $\text{C}_{26}\text{H}_{23}^{81}\text{BrNaO}_5\text{S}$ , 551.0327).

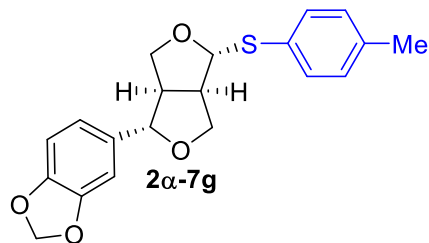

**4-Methylthiophenol samin (2α-7g).** Yield: 97%, white powder;  $^1\text{H}$  NMR (400 MHz,  $\text{CDCl}_3$ )  $\delta$  7.40 (d,  $J$  = 7.7 Hz, 2H), 7.13 (d,  $J$  = 7.8 Hz, 2H), 6.88 – 6.76 (m, 3H), 5.96 (s, 2H), 5.47 (s, 1H), 4.44 (t,  $J$  = 8.7 Hz, 1H), 4.36 (d,  $J$  = 7.5 Hz, 1H), 4.26 (dd,  $J$  = 9.4, 5.9 Hz, 1H), 3.92 (d,  $J$  = 9.5 Hz, 1H), 3.61 (m, 1H), 3.12 (m, 1H), 2.83 (m, 1H), 2.33 (s, 3H);  $^{13}\text{C}$  NMR (100 MHz,  $\text{CDCl}_3$ )  $\delta$  148.2, 147.5, 137.7, 134.6, 132.3, 131.2, 129.8, 119.8, 108.3, 106.7, 101.2, 92.5, 87.0, 73.5, 68.7, 53.4, 53.3, 21.2; HRESIMS  $m/z$  379.0987  $[\text{M}+\text{Na}]^+$  (calcd for  $\text{C}_{20}\text{H}_{20}\text{NaO}_4\text{S}$ , 379.0980).

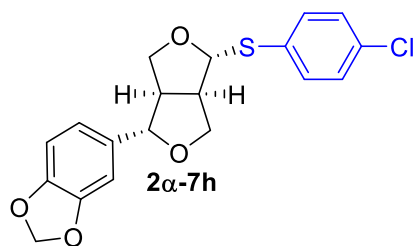

*4-Chlorothiophenol samin (2α-7h)*. Yield: 98%, yellow oil;  $^1\text{H}$  NMR (400 MHz,  $\text{CDCl}_3$ )  $\delta$  7.40 (d,  $J = 8.4$  Hz, 2H), 7.25 (d,  $J = 8.4$  Hz, 2H), 6.84 – 6.73 (m, 3H), 5.93 (s, 2H), 5.46 (s, 1H), 4.42 (t,  $J = 8.7$  Hz, 1H), 4.34 (d,  $J = 7.5$  Hz, 1H), 4.21 (dd,  $J = 9.5, 5.9$  Hz, 1H), 3.91 (d,  $J = 9.6$  Hz, 1H), 3.59 (dd,  $J = 9.0, 7.1$  Hz, 1H), 3.09 (m, 1H), 2.81 (m, 1H);  $^{13}\text{C}$  NMR (100 MHz,  $\text{CDCl}_3$ )  $\delta$  148.0, 147.4, 134.3, 133.5, 133.4, 132.8, 129.0, 119.6, 108.2, 106.5, 101.1, 92.0, 86.9, 73.3, 68.7, 53.2, 53.1.

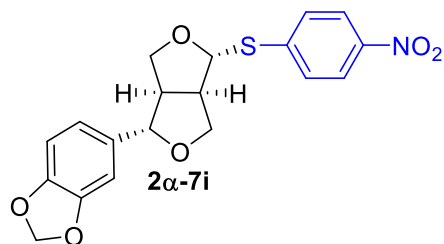

*4-nitrothiophenol samin (2α-7i)*. Yield: 83%, yellow powder;  $^1\text{H}$  NMR (400 MHz,  $\text{CDCl}_3$ )  $\delta$  8.13 (d,  $J = 8.8$  Hz, 2H), 7.59 (d,  $J = 8.8$  Hz, 2H), 6.87 – 6.75 (m, 3H), 5.95 (s, 2H), 5.73 (s, 1H), 4.48 (t,  $J = 8.8$  Hz, 1H), 4.41 (d,  $J = 7.5$  Hz, 1H), 4.21 (dd,  $J = 9.7, 5.8$  Hz, 1H), 3.99 (d,  $J = 9.6$  Hz, 1H), 3.67 (dd,  $J = 9.1, 7.0$  Hz, 1H), 3.16 (m, 1H), 2.88 (m, 1H);  $^{13}\text{C}$  NMR (100 MHz,  $\text{CDCl}_3$ )  $\delta$  148.2, 147.6, 146.2, 145.8, 134.2, 128.8, 124.0, 119.8, 108.4, 106.6, 101.3, 90.6, 87.0, 73.4, 69.2, 53.3, 53.2.

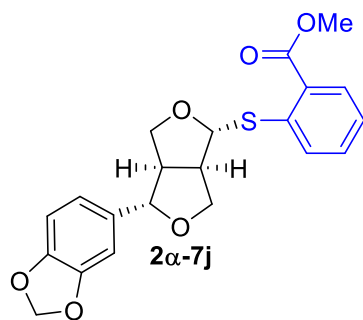

*Methyl thiosalicylate samin (2α-7j)*. Yield: 78%, white powder;  $^1\text{H}$  NMR (400 MHz,  $\text{CDCl}_3$ )  $\delta$  7.93 (dd,  $J = 7.8, 1.1$  Hz, 1H), 7.85 (d,  $J = 8.1$  Hz, 1H), 7.47 (m, 1H), 7.23 (dd,  $J = 14.2, 6.9$  Hz, 1H), 6.88 – 6.75 (m, 3H), 5.95 (s, 2H), 5.68 (s, 1H), 4.48 – 4.41 (m, 2H), 4.23 (dd,  $J = 9.5, 5.8$  Hz, 1H), 3.99 – 3.89 (m, 4H), 3.70 (dd,  $J = 9.1, 6.8$  Hz, 1H), 3.24 (m, 1H), 2.87 (m, 1H);  $^{13}\text{C}$  NMR (100 MHz,  $\text{CDCl}_3$ )  $\delta$  167.0, 148.1, 147.4, 139.9, 134.3, 132.4, 130.9, 128.8, 128.4, 125.1, 119.6, 108.2, 106.5, 101.1, 89.8, 86.8, 73.5, 68.9, 53.3, 53.0, 52.2; HRESIMS  $m/z$  423.0884  $[\text{M}+\text{Na}]^+$  (calcd for  $\text{C}_{21}\text{H}_{20}\text{NaO}_6\text{S}$ , 423.0878).

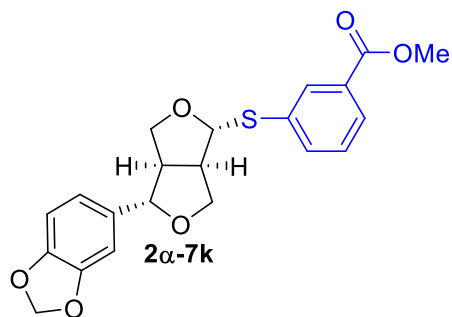

*Methyl 3-mercaptopbenzoate samin (2α-7k)*. Yield: 85%, white powder;  $^1\text{H}$  NMR (400 MHz,  $\text{CDCl}_3$ )  $\delta$  8.16 (s, 1H), 7.92 (d,  $J = 7.7$  Hz, 1H), 7.68 (d,  $J = 7.8$  Hz, 1H), 7.38 (t,  $J = 7.8$  Hz, 1H), 6.88 – 6.75 (m, 3H), 5.95 (s, 2H), 5.58 (s, 1H), 4.46 (t,  $J = 8.7$  Hz, 1H), 4.38 (d,  $J = 7.5$  Hz, 1H), 4.26 (dd,  $J = 9.5, 5.9$  Hz, 1H), 3.96 (d,  $J = 9.6$  Hz, 1H), 3.92 (s, 3H), 3.64 (dd,  $J = 9.0, 7.1$  Hz, 1H), 3.14 (m, 1H), 2.85 (m, 1H);  $^{13}\text{C}$  NMR (100 MHz,  $\text{CDCl}_3$ )  $\delta$  166.5, 148.1, 147.4, 135.7, 135.5, 134.3, 132.2, 130.9, 130.8, 128.9, 128.3, 119.6, 108.2, 106.5, 101.1, 91.8, 86.8, 73.3, 68.7, 53.2, 52.2; HRESIMS  $m/z$  423.0884  $[\text{M}+\text{Na}]^+$  (calcd for  $\text{C}_{21}\text{H}_{20}\text{NaO}_6\text{S}$ , 423.0878).

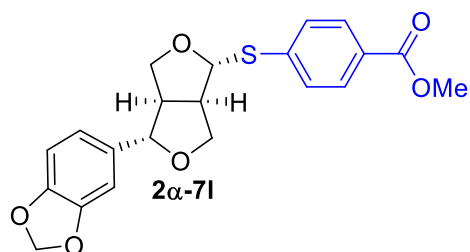

*Methyl 4-mercaptopbenzoate samin (2α-7l)*. Yield: 90%, white powder;  $^1\text{H}$  NMR (400 MHz,  $\text{CDCl}_3$ )  $\delta$  7.95 (d,  $J = 8.4$  Hz, 2H), 7.53 (d,  $J = 8.4$  Hz, 2H), 6.88 – 6.76 (m, 3H), 5.96 (s, 2H), 5.68 (s, 1H), 4.47 (t,  $J = 8.7$  Hz, 1H), 4.40 (d,  $J = 7.5$  Hz, 1H), 4.23 (m, 1H), 3.97 (d,  $J = 9.6$  Hz, 1H), 3.91 (s, 3H), 3.67 (dd,  $J = 9.0, 7.1$  Hz, 1H), 3.15 (m, 1H), 2.86 (m, 1H);  $^{13}\text{C}$  NMR (100 MHz,  $\text{CDCl}_3$ )  $\delta$  166.7, 148.1, 147.5, 142.1, 134.2, 129.9, 129.0, 128.8, 119.7, 108.2, 106.5, 101.1, 90.8, 86.9, 73.4, 68.9, 53.2, 53.1, 52.1; HRESIMS  $m/z$  423.0884  $[\text{M}+\text{Na}]^+$  (calcd for  $\text{C}_{21}\text{H}_{20}\text{NaO}_6\text{S}$ , 423.0878).

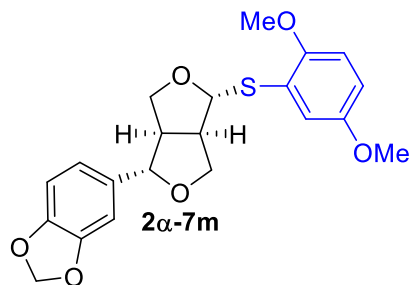

*2,5-Dimethoxythiophenol samin (2α-7m)*. Yield: 87%, colorless oil;  $^1\text{H}$  NMR (400 MHz,  $\text{CDCl}_3$ )  $\delta$  7.17 (d,  $J = 2.6$  Hz, 1H), 6.87 – 6.74 (m, 5H), 5.94 (s, 2H), 5.68 (s, 1H), 4.44 (t,  $J = 8.7$  Hz, 1H), 4.37 (d,  $J = 7.6$  Hz, 1H), 4.23 (dd,  $J = 9.5, 5.9$  Hz, 1H), 3.91 (d,  $J = 9.5$  Hz, 1H), 3.84 (s, 3H, H-OCH<sub>3</sub>), 3.77 (s, 3H, H-OCH<sub>3</sub>), 3.64 (dd,  $J = 8.9, 7.2$  Hz, 1H), 3.17 (m, 1H), 2.84 (m, 1H);  $^{13}\text{C}$  NMR (100 MHz,  $\text{CDCl}_3$ )  $\delta$  153.9, 152.1, 148.0, 147.4, 134.4, 124.0, 119.6, 118.0, 112.9, 111.7, 108.2, 106.6, 101.1, 89.8, 86.9, 73.4, 68.8, 56.5, 55.8, 53.3, 53.2; HRESIMS  $m/z$  425.1048  $[\text{M}+\text{Na}]^+$  (calcd for  $\text{C}_{21}\text{H}_{22}\text{NaO}_6\text{S}$ , 425.1035).



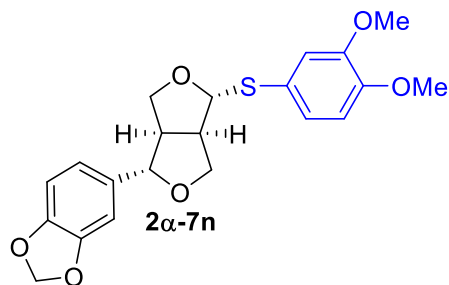

*3,4-Dimethoxythiophenol samin (2α-7n)*. Yield: 87%, colorless oil;  $^1\text{H}$  NMR (400 MHz,  $\text{CDCl}_3$ )  $\delta$  7.09 (dd,  $J = 8.3$ , 1.8 Hz, 1H), 7.05 (d,  $J = 1.6$  Hz, 1H), 6.81 (m, 4H), 5.95 (s, 2H), 5.42 (s, 1H), 4.44 (t,  $J = 8.7$  Hz, 1H), 4.37 (d,  $J = 7.5$  Hz, 1H), 4.27 (dd,  $J = 9.4$ , 5.9 Hz, 1H), 3.93 (d,  $J = 9.5$  Hz, 1H), 3.89 (s, 3H, H-OCH<sub>3</sub>), 3.87 (s, 3H, H-OCH<sub>3</sub>), 3.62 (dd,  $J = 8.9$ , 7.1 Hz, 1H), 3.11 (m, 1H), 2.82 (m, 1H);  $^{13}\text{C}$  NMR (100 MHz,  $\text{CDCl}_3$ )  $\delta$  149.3, 149.1, 148.0, 147.4, 134.4, 125.8, 125.5, 119.6, 116.1, 111.6, 108.2, 106.5, 101.9, 92.9, 86.8, 73.4, 68.6, 56.0, 56.0, 53.3, 53.0; HRESIMS  $m/z$  425.1048  $[\text{M}+\text{Na}]^+$  (calcd for  $\text{C}_{21}\text{H}_{22}\text{NaO}_6\text{S}$ , 425.1035).

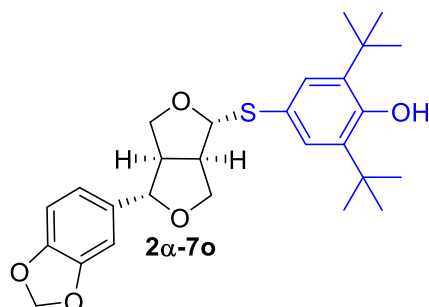

*2,6-Di-tert-butyl-4-mercaptophenol samin (2α-7o)*. Yield: 89%, yellow oil;  $^1\text{H}$  NMR (400 MHz,  $\text{CDCl}_3$ )  $\delta$  7.33 (s, 2H), 6.87 – 6.75 (m, 3H), 5.95 (s, 2H), 5.39 (s, 1H), 4.43 (t,  $J = 8.7$  Hz, 1H), 4.37 (d,  $J = 7.5$  Hz, 1H), 4.29 (dd,  $J = 9.4$ , 5.9 Hz, 1H), 3.93 (d,  $J = 9.4$  Hz, 1H), 3.61 (m, 1H), 3.11 (m, 1H), 2.81 (m, 1H), 1.43 (s, 18H);  $^{13}\text{C}$  NMR (100 MHz,  $\text{CDCl}_3$ )  $\delta$  154.2, 148.2, 147.5, 136.7, 130.4, 127.9, 119.8, 108.3, 106.7, 101.2, 93.1, 86.98, 73.5, 68.5, 53.5, 53.2, 34.5, 30.3; HRESIMS  $m/z$  493.2024  $[\text{M}+\text{Na}]^+$  (calcd for  $\text{C}_{27}\text{H}_{34}\text{NaO}_5\text{S}$ , 493.2025).

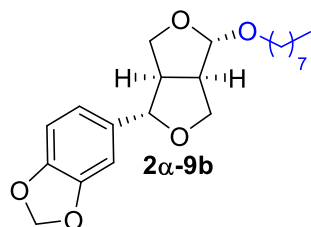

*Octanol samin (2α-9b)*. Yield: quant., pale yellow oil;  $^1\text{H}$  NMR (400 MHz,  $\text{CDCl}_3$ )  $\delta$  6.85 (d,  $J = 0.8$  Hz, 1H), 6.80 (dd,  $J = 8.0$ , 1.2 Hz, 1H), 6.78 (d,  $J = 7.6$  Hz, 1H), 5.94 (s, 2H), 4.93 (s, 1H), 4.38 (d,  $J = 8.8$  Hz, 1H), 4.34 (t,  $J = 7.2$  Hz, 1H), 3.97 (dd,  $J = 8.8$ , 6.0 Hz, 1H), 3.85 (d,  $J = 8.8$  Hz, 1H), 3.65 (m, 1H), 3.55 (dd,  $J = 8.8$ , 7.6 Hz, 1H), 3.37 (m, 1H), 3.04 (q,  $J = 8.8$  Hz, 1H), 2.81 (q,  $J = 9.2$  Hz, 1H), 1.59-1.54 (m, 4H), 1.27 (overlap, 8H), 0.87 (t,  $J = 6.8$  Hz, 3H);  $^{13}\text{C}$  NMR (100 MHz,  $\text{CDCl}_3$ )  $\delta$  148.1, 147.4, 134.9, 119.8, 108.3, 107.6, 106.7, 101.2, 87.2, 71.6, 69.0, 67.6, 53.2, 52.9, 31.9, 29.8, 29.5, 29.4, 26.3, 22.8, 14.2; HRESIMS  $m/z$  385.1997  $[\text{M}+\text{Na}]^+$  (calcd for  $\text{C}_{21}\text{H}_{30}\text{NaO}_5$ , 385.1991).

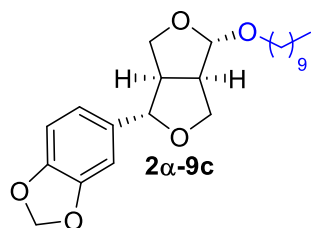

*Decanol samin (2α-9c)*. Yield: quant., colorless oil;  $^1\text{H}$  NMR (400 MHz,  $\text{CDCl}_3$ )  $\delta$  6.85 (d,  $J = 1.6$  Hz, 1H), 6.81-6.75 (m, 2H), 5.94 (s, 2H), 4.93 (s, 1H), 4.38 (d,  $J = 8.8$  Hz, 1H), 4.35 (t,  $J = 7.6$  Hz, 1H), 3.97 (dd,  $J = 9.2, 6.0$  Hz, 1H), 3.85 (d,  $J = 8.4$  Hz, 1H), 3.65 (m, 1H), 3.55 (dd,  $J = 8.8, 7.6$  Hz, 1H), 3.36 (m, 1H), 3.04 (q,  $J = 8.8$  Hz, 1H), 2.81 (m, 1H), 1.60-1.52 (m, 4H), 1.26 (overlap, 12H), 0.87 (t,  $J = 6.8$  Hz, 3H);  $^{13}\text{C}$  NMR (100 MHz,  $\text{CDCl}_3$ )  $\delta$  148.1, 147.4, 134.9, 119.8, 108.3, 107.6, 106.7, 101.2, 87.2, 71.6, 69.0, 67.6, 53.3, 52.9, 32.0, 29.8, 29.7, 29.7, 29.6, 29.4, 26.3, 22.8, 14.2; HRESIMS  $m/z$  413.2306  $[\text{M}+\text{Na}]^+$  (calcd for  $\text{C}_{23}\text{H}_{34}\text{NaO}_5$ , 413.2304).

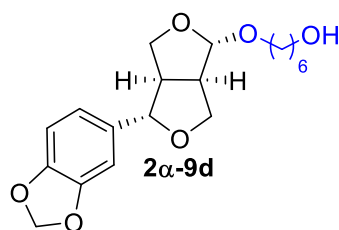

*1,6-Hexanediol samin (2α-9d)*. Yield: quant., colorless oil;  $^1\text{H}$  NMR (400 MHz,  $\text{CDCl}_3$ )  $\delta$  6.85 (s, 1H), 6.81-6.76 (m, 2H), 5.94 (s, 2H), 4.93 (s, 1H), 4.38 (d,  $J = 8.8$  Hz, 1H), 4.35 (t,  $J = 8.0$  Hz, 1H), 3.96 (dd,  $J = 9.2, 6.0$  Hz, 1H), 3.85 (d,  $J = 8.8$  Hz, 1H), 3.69-3.62 (m, 3H), 3.55 (dd,  $J = 8.8, 8.0$  Hz, 1H), 3.38 (m, 1H), 3.03 (q,  $J = 8.4$  Hz, 1H), 2.81 (q,  $J = 8.8$  Hz, 1H), 1.59-1.56 (m, 2H), 1.43-1.33 (m, 6H);  $^{13}\text{C}$  NMR (100 MHz,  $\text{CDCl}_3$ )  $\delta$  148.1, 147.4, 134.9, 119.8, 108.3, 107.6, 106.7, 101.2, 87.2, 71.5, 69.1, 67.4, 64.6, 53.2, 52.9, 32.8, 29.7, 28.7, 25.9; HRESIMS  $m/z$  373.1630  $[\text{M}+\text{Na}]^+$  (calcd for  $\text{C}_{19}\text{H}_{26}\text{NaO}_6$ , 373.1627).

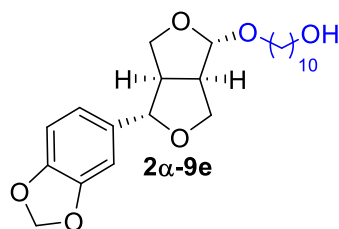

*1,10-Decanediol samin (2α-9e)*. Yield: quant., colorless oil;  $^1\text{H}$  NMR (400 MHz,  $\text{CDCl}_3$ )  $\delta$  6.85 (s, 1H), 6.81-6.75 (m, 2H), 5.94 (s, 2H), 4.93 (s, 1H), 4.38 (d,  $J = 8.8$  Hz, 1H), 4.35 (t,  $J = 7.6$  Hz, 1H), 3.97 (dd,  $J = 8.8, 6.0$  Hz, 1H), 3.85 (d,  $J = 8.8$  Hz, 1H), 3.68-3.62 (m, 3H), 3.55 (dd,  $J = 8.8, 7.6$  Hz, 1H, H-8), 3.37 (m, 1H), 3.04 (q,  $J = 8.4$  Hz, 1H), 2.82 (q,  $J = 8.8$  Hz, 1H), 1.57-1.54 (m, 2H), 1.28-1.25 (m, 14H);  $^{13}\text{C}$  NMR (100 MHz,  $\text{CDCl}_3$ )  $\delta$  148.1, 147.4, 134.9, 119.8, 108.3, 107.6, 106.7, 101.2, 87.2, 71.6, 69.1, 67.6, 63.2, 53.2, 52.9, 32.9, 29.8, 29.8, 29.7, 29.6, 29.5, 26.3, 25.9; HRESIMS  $m/z$  429.2261  $[\text{M}+\text{Na}]^+$  (calcd for  $\text{C}_{23}\text{H}_{34}\text{NaO}_6$ , 429.2253).

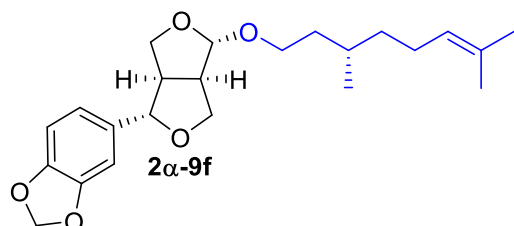

*$\beta$ -Citronellol samin (2 $\alpha$ -9f).* Yield: 90%, colorless oil;  $^1\text{H}$  NMR (400 MHz,  $\text{CDCl}_3$ )  $\delta$  6.85 (s, 1H), 6.81-6.76 (m, 2H), 5.94 (s, 2H), 5.09 (t,  $J = 6.8$  Hz, 1H), 4.93 (s, 1H), 4.38 (d,  $J = 8.8$  Hz, 1H), 4.35 (t,  $J = 7.2$  Hz, 1H), 3.97 (dd,  $J = 9.8$ , 6.0 Hz, 1H), 3.85 (d,  $J = 8.8$  Hz, 1H), 3.70 (m, 1H), 3.55 (dd,  $J = 8.8$ , 7.6 Hz, 1H), 3.40 (m, 1H), 3.03 (q,  $J = 9.2$  Hz, 1H), 2.81 (q,  $J = 6.8$  Hz, 1H), 2.03-1.91 (m, 2H), 1.68 (s, 3H), 1.59 (s, 3H), 1.54 (m, 1H), 1.41-1.30 (m, 3H), 1.16 (m, 1H), 0.89 (d,  $J = 6.4$  Hz, 3H);  $^{13}\text{C}$  NMR (100 MHz,  $\text{CDCl}_3$ )  $\delta$  148.1, 147.4, 135.0, 131.3, 124.9, 119.8, 108.3, 107.5, 106.7, 101.2, 87.2, 71.6, 69.1, 65.9, 53.3, 53.0, 37.4, 36.8, 29.8, 25.8, 25.6, 19.8, 17.8; HRESIMS  $m/z$  411.2155  $[\text{M}+\text{Na}]^+$  (calcd for  $\text{C}_{23}\text{H}_{32}\text{NaO}_5$ , 411.2147).

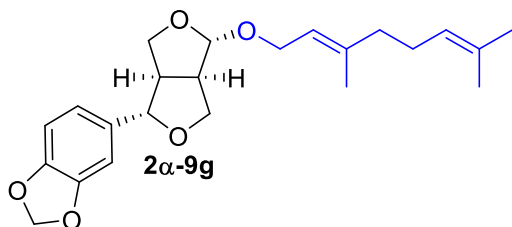

*Geraniol samin (2 $\alpha$ -9g).* Yield: 89%, colorless oil;  $^1\text{H}$  NMR (400 MHz,  $\text{CDCl}_3$ )  $\delta$  6.85 (s, 1H), 6.81-6.75 (m, 2H), 5.94 (s, 2H), 5.33 (t,  $J = 6.4$  Hz, 1H), 5.09 (m, 1H), 4.99 (s, 1H), 4.38 (d,  $J = 9.2$  Hz, 1H), 4.35 (dd,  $J = 8.4$ , 7.2 Hz, 1H), 4.17 (dd,  $J = 12.0$ , 6.8 Hz, 1H), 4.02-3.97 (m, 2H), 3.87 (d,  $J = 8.8$  Hz, 1H), 3.55 (dd,  $J = 9.2$ , 7.6 Hz, 1H), 3.06 (m, 1H), 2.82 (m, 1H), 2.10-2.04 (m, 4H), 1.68 (s, 6H), 1.60 (s, 3H);  $^{13}\text{C}$  NMR (100 MHz,  $\text{CDCl}_3$ )  $\delta$  148.1, 147.4, 141.1, 134.9, 131.8, 124.1, 120.2, 119.8, 108.3, 106.8, 106.7, 101.2, 87.2, 71.6, 69.1, 63.6, 53.3, 53.0, 39.8, 26.5, 25.8, 17.8, 16.6; HRESIMS  $m/z$  409.1992  $[\text{M}+\text{Na}]^+$  (calcd for  $\text{C}_{23}\text{H}_{30}\text{NaO}_5$ , 409.1991).

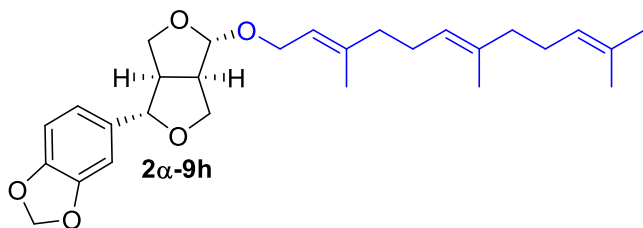

*trans,trans-Farnesol samin (2 $\alpha$ -9h).* Yield: 84%, colorless oil;  $^1\text{H}$  NMR (400 MHz,  $\text{CDCl}_3$ )  $\delta$  6.85 (s, 1H), 6.79-6.75 (m, 2H), 5.94 (s, 2H), 5.33 (m, 1H), 5.10-5.07 (m, 2H), 4.98 (s, 1H), 4.38 (d,  $J = 8.8$  Hz, 1H), 4.34 (dd,  $J = 9.6$ , 7.6 Hz, 1H), 4.18 (m, 1H), 4.01-3.98 (m, 2H), 3.86 (d,  $J = 8.8$  Hz, 1H), 3.54 (dd,  $J = 8.8$ , 8.8 Hz, 1H), 3.06 (m, 1H), 2.81 (m, 1H), 2.12-1.95 (m, 8H), 1.69 (s, 3H), 1.67 (s, 3H), 1.59 (s, 6H);  $^{13}\text{C}$  NMR (100 MHz,  $\text{CDCl}_3$ )  $\delta$  148.1, 147.4, 141.1, 135.5, 134.9, 131.4, 124.5, 123.9, 120.2, 119.8, 108.3, 106.7, 106.7, 101.2, 87.1, 71.5, 69.1, 63.6, 53.2, 53.0, 39.8, 39.7, 26.9, 26.4, 25.8, 17.8, 16.6, 16.1; HRESIMS  $m/z$  477.2617  $[\text{M}+\text{Na}]^+$  (calcd for  $\text{C}_{28}\text{H}_{38}\text{NaO}_5$ , 477.2617).

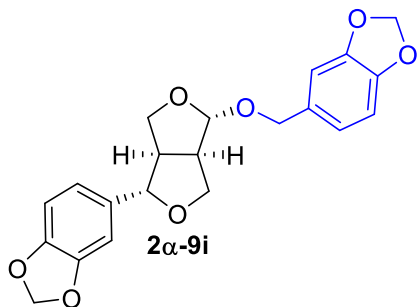

*Piperonyl alcohol samin (2 $\alpha$ -9i).* Yield: 45%, white solid;  $^1\text{H}$  NMR (400 MHz,  $\text{CDCl}_3$ )  $\delta$  6.80 (m, 6H), 5.95 (d,  $J = 1.0$  Hz, 4H), 5.02 (s, 1H), 4.60 (d,  $J = 11.4$  Hz, 1H), 4.42 – 4.31 (m, 3H), 4.03 (dd,  $J = 9.1$ , 6.0 Hz, 1H), 3.90 (d,  $J = 9.0$  Hz, 1H), 3.57 – 3.51 (m, 1H), 3.09 (dd,  $J = 16.9$ , 8.7 Hz, 1H), 2.83 (dd,  $J = 15.5$ , 6.7 Hz, 1H);  $^{13}\text{C}$  NMR (100

MHz, CDCl<sub>3</sub>)  $\delta$  148.1, 134.8, 131.6, 121.9, 119.8, 108.9, 108.3, 106.7, 106.5, 101.2, 101.2, 87.2, 71.5, 69.3, 68.9, 53.2, 52.9.

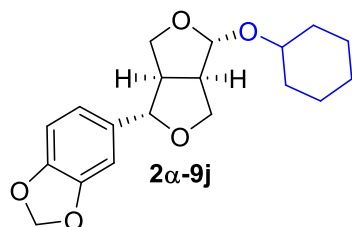

*Cyclohexanol samín* (**2α-9j**). Yield: 93%, colorless oil; <sup>1</sup>H NMR (400 MHz, CDCl<sub>3</sub>)  $\delta$  6.85 (d,  $J$  = 0.8 Hz, 1H), 6.81-6.75 (m, 2H), 5.94 (s, 2H), 4.93 (s, 1H), 4.37 (d,  $J$  = 8.8 Hz, 1H), 4.34 (dd,  $J$  = 8.0, 5.6 Hz, 1H), 4.01 (dd,  $J$  = 8.8, 6.0 Hz, 1H), 3.83 (d,  $J$  = 8.8 Hz, 1H), 3.55 (m, 2H), 3.02 (q,  $J$  = 8.4 Hz, 1H), 2.83 (m, 1H), 1.89-1.52 (m, 10H); <sup>13</sup>C NMR (100 MHz, CDCl<sub>3</sub>)  $\delta$  148.1, 147.4, 135.0, 119.8, 108.3, 106.8, 105.6, 101.2, 87.3, 74.9, 71.6, 69.0, 53.5, 53.0, 34.0, 32.0, 25.8, 24.5, 24.4; HRESIMS  $m/z$  355.1527 [M+Na]<sup>+</sup> (calcd for C<sub>19</sub>H<sub>24</sub>NaO<sub>5</sub>, 355.1521).

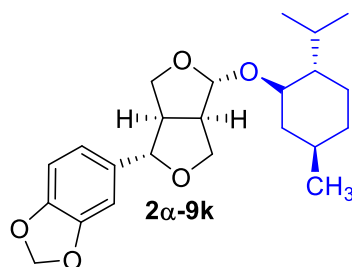

*α-Terpeneol samín* (**2α-9k**). Yield: 89%, colorless oil; <sup>1</sup>H NMR (400 MHz, CDCl<sub>3</sub>)  $\delta$  6.84 (s, 1H), 6.81-6.75 (m, 2H), 5.94 (s, 2H), 5.01 (s, 1H), 4.38 (d,  $J$  = 8.8 Hz, 1H), 4.35 (dd,  $J$  = 8.4, 6.4 Hz, 1H), 4.05 (dd,  $J$  = 9.2, 6.4 Hz, 1H), 3.84 (d,  $J$  = 8.8 Hz, 1H), 3.54 (dd,  $J$  = 9.2, 7.6 Hz, 1H), 3.31 (ddd,  $J$  = 10.4, 10.0, 4.4 Hz, 1H), 3.04 (q,  $J$  = 8.0 Hz, 1H), 2.83 (q,  $J$  = 8.8 Hz, 1H), 2.13-2.04 (m, 2H), 1.63-1.59 (m, 3H), 1.40 (m, 1H), 1.17 (m, 1H), 1.01-0.94 (m, 2H), 0.91 (d,  $J$  = 4.8 Hz, 3H), 0.89 (d,  $J$  = 4.4 Hz, 3H), 0.78 (d,  $J$  = 6.8 Hz, 3H); <sup>13</sup>C NMR (100 MHz, CDCl<sub>3</sub>)  $\delta$  148.1, 147.4, 135.1, 119.8, 109.4, 108.3, 106.7, 101.2, 87.3, 79.7, 71.7, 69.1, 53.4, 52.9, 48.9, 43.6, 34.5, 31.9, 25.9, 23.5, 22.4, 21.3, 16.5; HRESIMS  $m/z$  411.2143 [M+Na]<sup>+</sup> (calcd for C<sub>23</sub>H<sub>32</sub>NaO<sub>5</sub>, 411.2147).

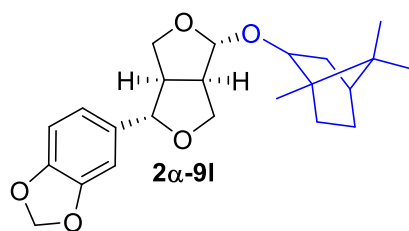

*Borneol samín* (**2α-9l**). Yield: 90%, colorless oil; <sup>1</sup>H NMR (400 MHz, CDCl<sub>3</sub>)  $\delta$  6.85 (s, 1H), 6.82-6.76 (m, 2H), 5.95 (s, 2H), 4.95 (s, 1H), 4.38 (d,  $J$  = 8.8 Hz, 1H), 4.34 (dd,  $J$  = 12.8, 8.0 Hz, 1H), 3.98 (dd,  $J$  = 8.8, 6.0 Hz, 1H), 3.82 (d,  $J$  = 8.8 Hz, 1H), 3.76 (brd,  $J$  = 8.0 Hz, 1H), 3.53 (dd,  $J$  = 8.8, 7.6 Hz, 1H), 3.07 (q,  $J$  = 8.4 Hz, 1H), 2.84 (q,  $J$  = 9.2 Hz, 1H), 2.22 (m, 1H), 1.89 (m, 1H), 1.68-1.58 (m, 2H), 1.22-1.15 (m, 2H), 1.01 (dd,  $J$  = 13.6, 3.2 Hz, 1H), 0.85 (s, 3H), 0.84 (s, 3H), 0.83 (s, 3H); <sup>13</sup>C NMR (100 MHz, CDCl<sub>3</sub>)  $\delta$  148.1, 147.4, 135.1, 119.8, 109.2, 108.3, 106.8, 101.2, 87.2, 84.0, 71.7, 69.0, 53.3, 53.1, 49.4, 47.5, 45.2, 37.9, 28.4, 26.9, 19.9, 18.9, 14.0; HRESIMS  $m/z$  409.1992 [M+Na]<sup>+</sup> (calcd for C<sub>23</sub>H<sub>30</sub>NaO<sub>5</sub>, 409.1991).

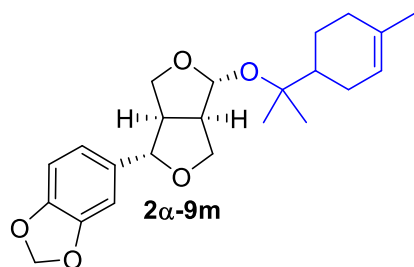

*$\alpha$ -Terpineol samin (2 $\alpha$ -9m).* Yield: 81%, colorless oil;  $^1\text{H}$  NMR (400 MHz,  $\text{CDCl}_3$ )  $\delta$  6.84 (d,  $J$  = 1.6 Hz, 1H), 6.80-6.77 (m, 2H), 5.94 (s, 2H), 5.37 (brs, 1H), 5.24 (s, 1H), 4.36 (d,  $J$  = 5.6 Hz, 1H), 4.33 (dd,  $J$  = 6.0, 4.0 Hz, 1H), 4.05 (dd,  $J$  = 9.2, 6.0 Hz, 1H), 3.80 (d,  $J$  = 8.8 Hz, 1H), 3.57 (dd,  $J$  = 8.8, 7.2 Hz, 1H), 2.95 (m, 1H), 2.83 (m, 1H), 2.04-1.96 (m, 4H), 1.83-1.81 (m, 3H), 1.64 (s, 3H), 1.57 (s, 3H), 1.19 (s, 3H);  $^{13}\text{C}$  NMR (100 MHz,  $\text{CDCl}_3$ )  $\delta$  148.1, 147.4, 135.3, 134.1, 121.0, 119.7, 108.3, 106.7, 102.3, 101.2, 87.2, 78.5, 71.8, 69.1, 54.2, 53.2, 44.2, 31.2, 26.9, 24.3, 24.0, 23.6, 23.5; HRESIMS  $m/z$  409.1992  $[\text{M}+\text{Na}]^+$  (calcd for  $\text{C}_{23}\text{H}_{30}\text{NaO}_5$ , 409.1991)

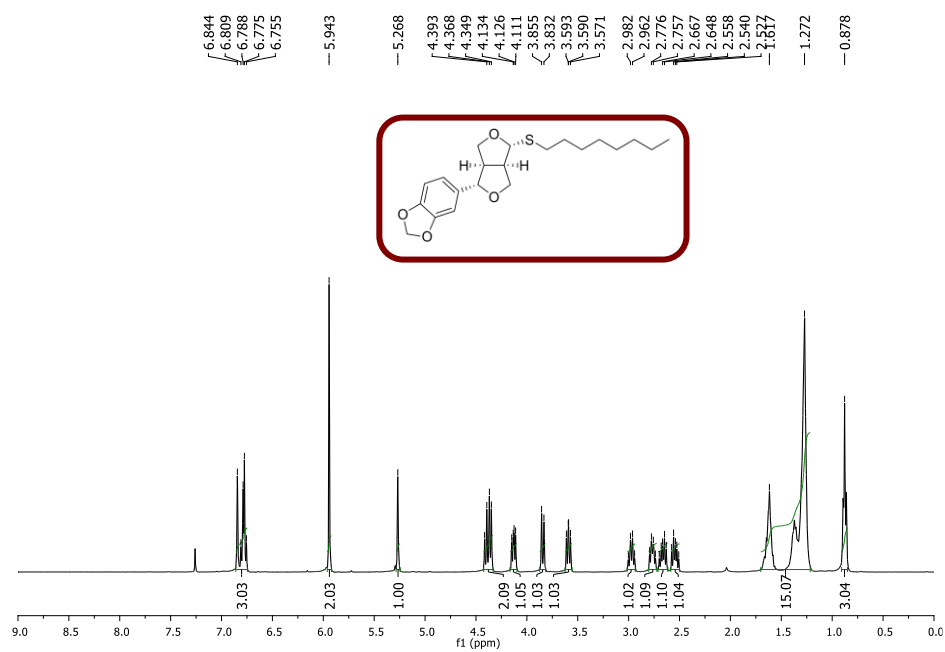

Figure S1. <sup>1</sup>H NMR spectrum of **2a-7a** (CDCl<sub>3</sub>)

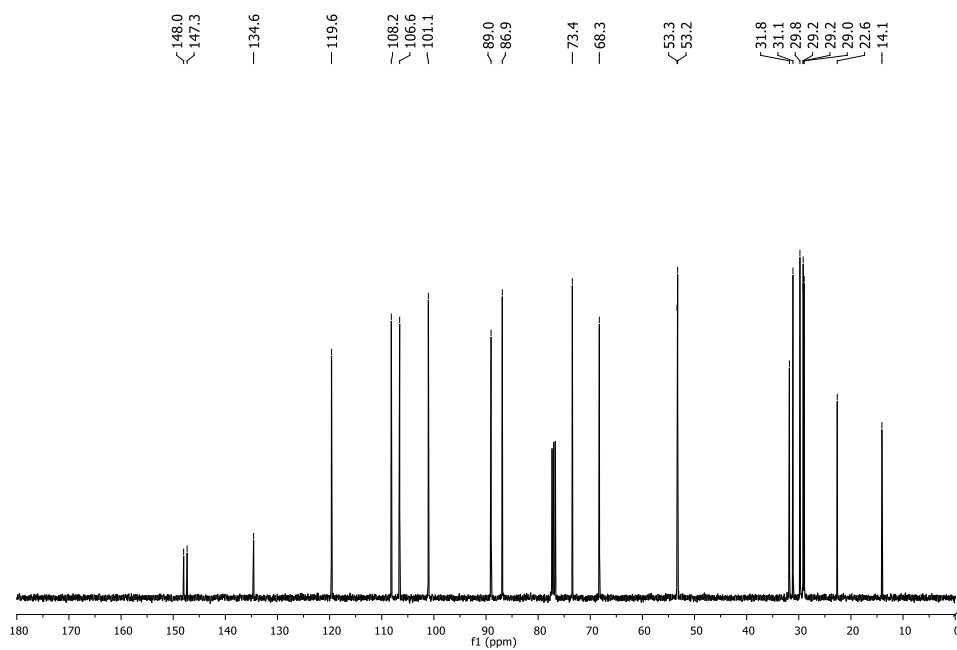

Figure S2. <sup>13</sup>C NMR spectrum of **2a-7a** (CDCl<sub>3</sub>)

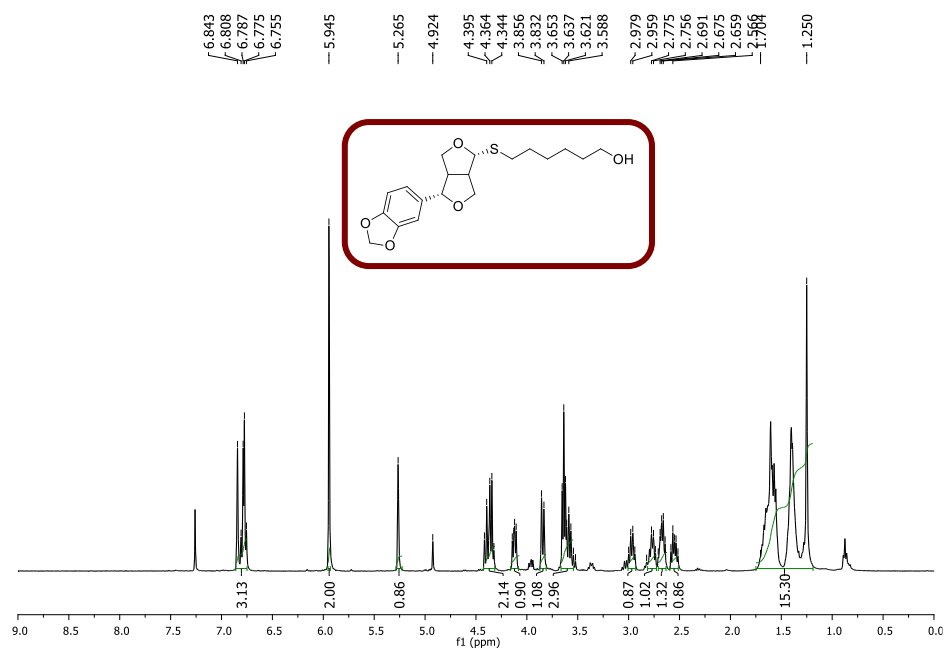

Figure S3. <sup>1</sup>H NMR spectrum of **2a-7b** (CDCl<sub>3</sub>)

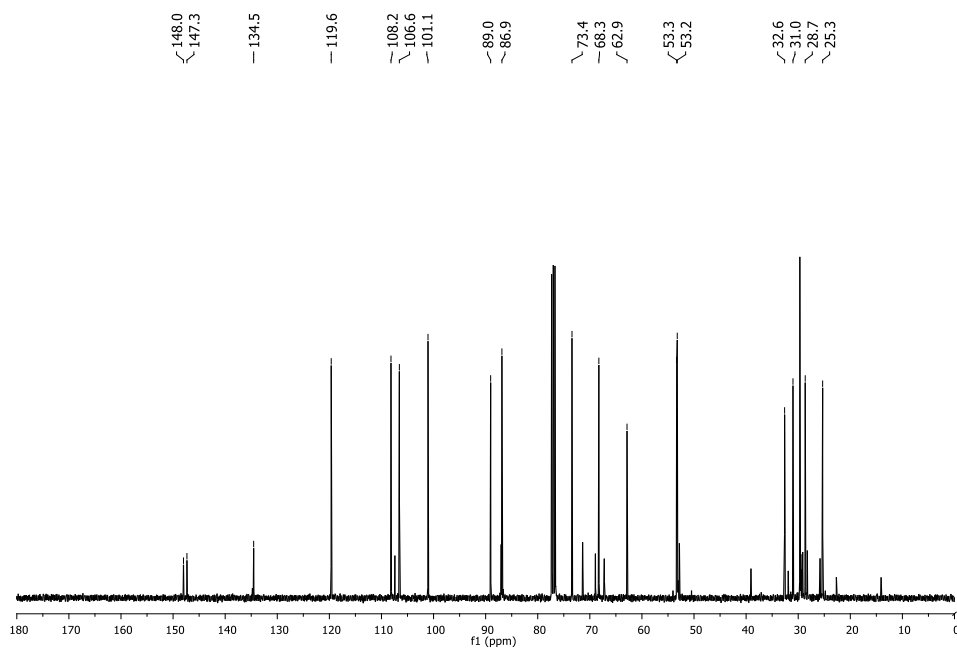

Figure S4. <sup>13</sup>C NMR spectrum of **2a-7b** (CDCl<sub>3</sub>)

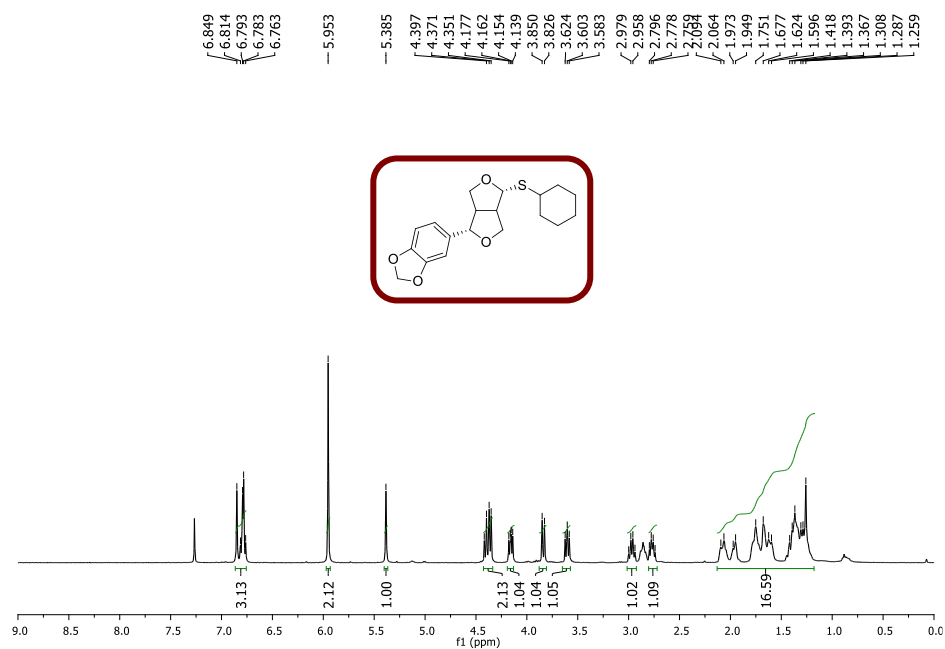

Figure S5. <sup>1</sup>H NMR spectrum of **2a-7c** (CDCl<sub>3</sub>)

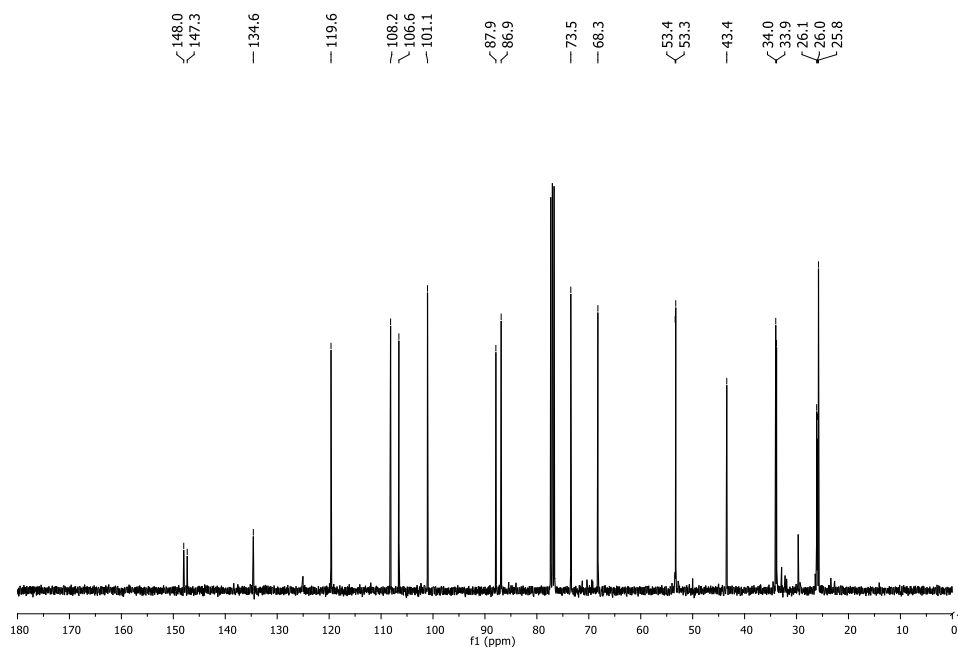

Figure S6. <sup>13</sup>C NMR spectrum of **2a-7c** (CDCl<sub>3</sub>)



148.0  
147.4  
138.2  
134.5  
128.9  
128.6  
127.0  
119.6  
108.2  
106.6  
101.1  
87.5  
86.9  
77.3  
77.0  
76.7  
73.4  
68.4  
53.3  
52.8  
34.8

f1 (ppm)

**Figure S8.**  $^{13}\text{C}$  NMR spectrum of **2a-7d** ( $\text{CDCl}_3$ )

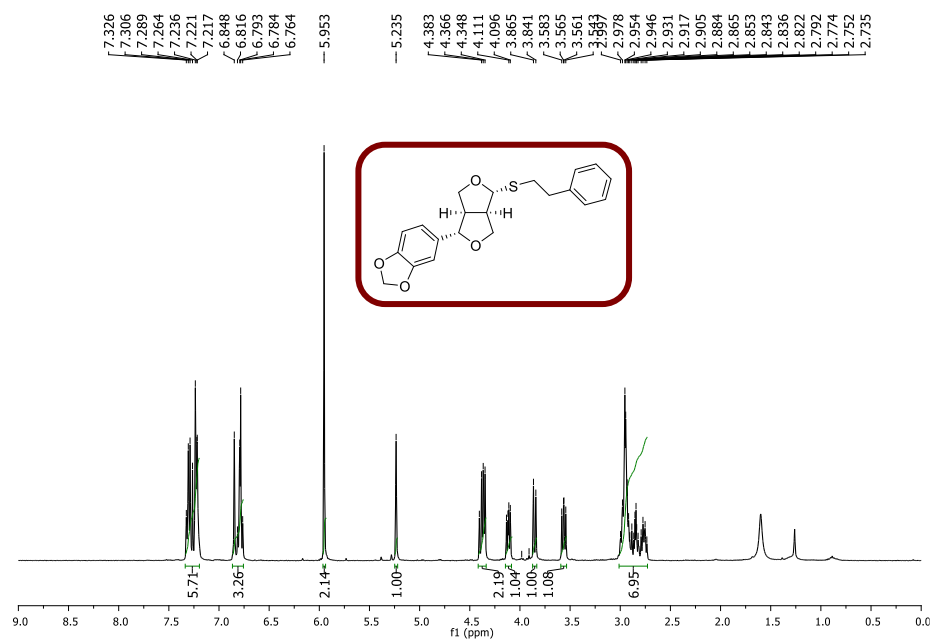

**Figure S9.** <sup>1</sup>H NMR spectrum of **2a-7e** (CDCl<sub>3</sub>)

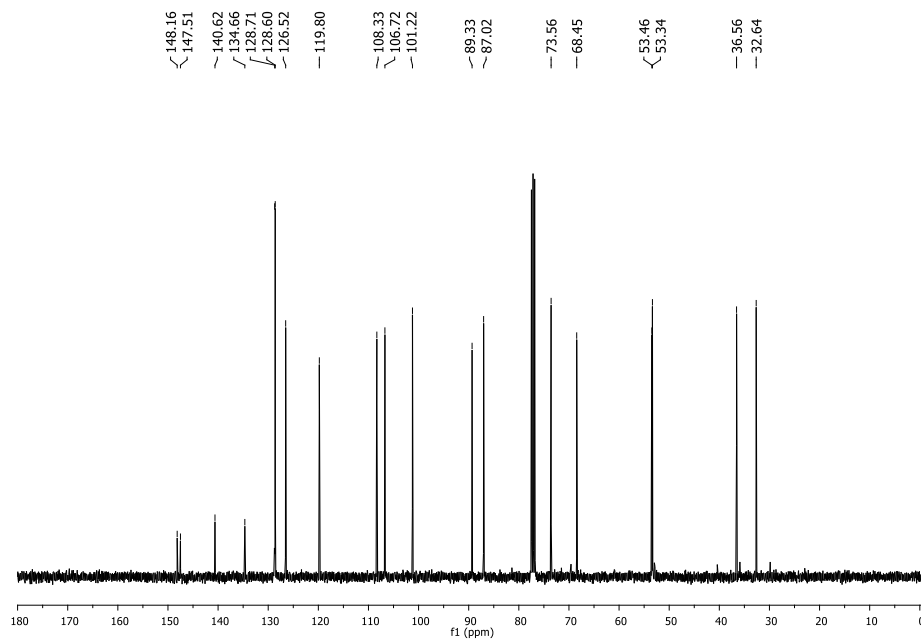

**Figure S10.** <sup>13</sup>C NMR spectrum of **2a-7e** (CDCl<sub>3</sub>)

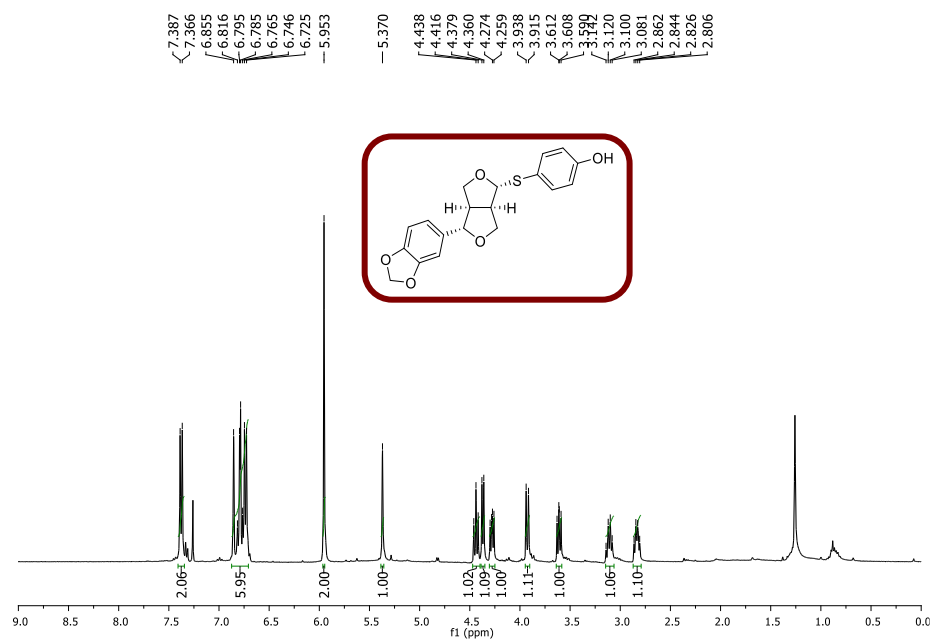

Figure S11. <sup>1</sup>H NMR spectrum of **2a-7f** (CDCl<sub>3</sub>)

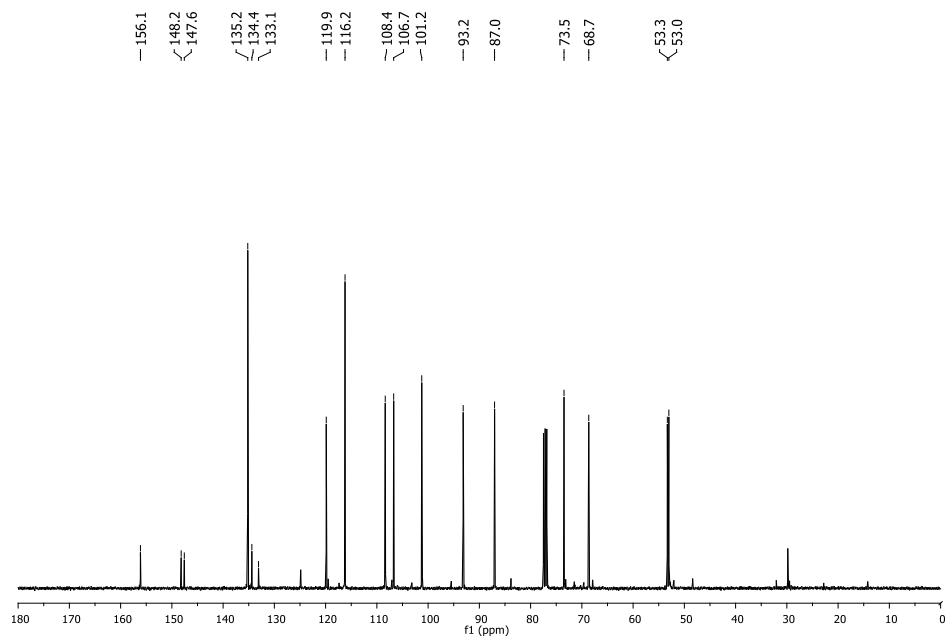

Figure S12. <sup>13</sup>C NMR spectrum of **2a-7f** (CDCl<sub>3</sub>)

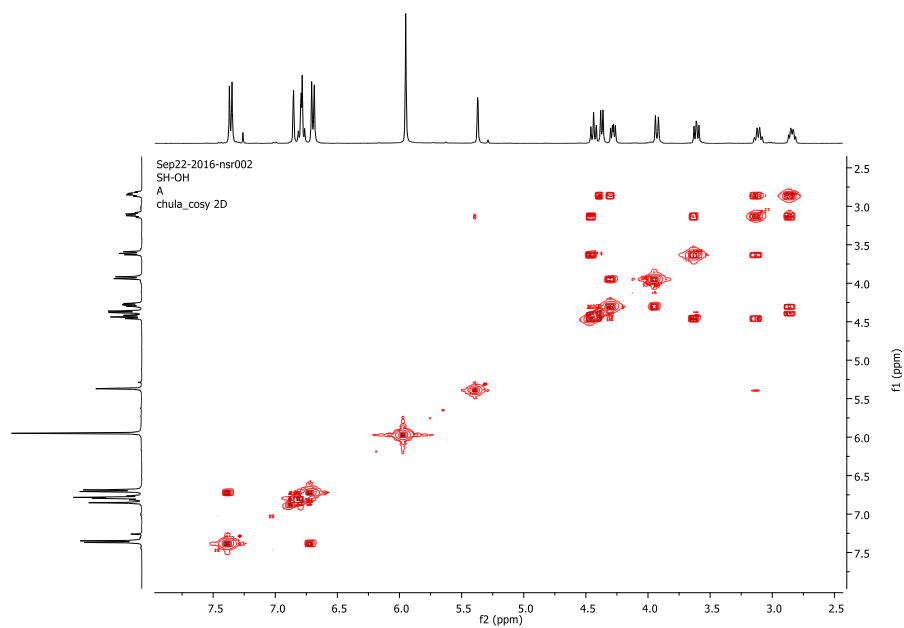

**Figure S13.** COSY spectrum of **2a-7f** ( $\text{CDCl}_3$ )

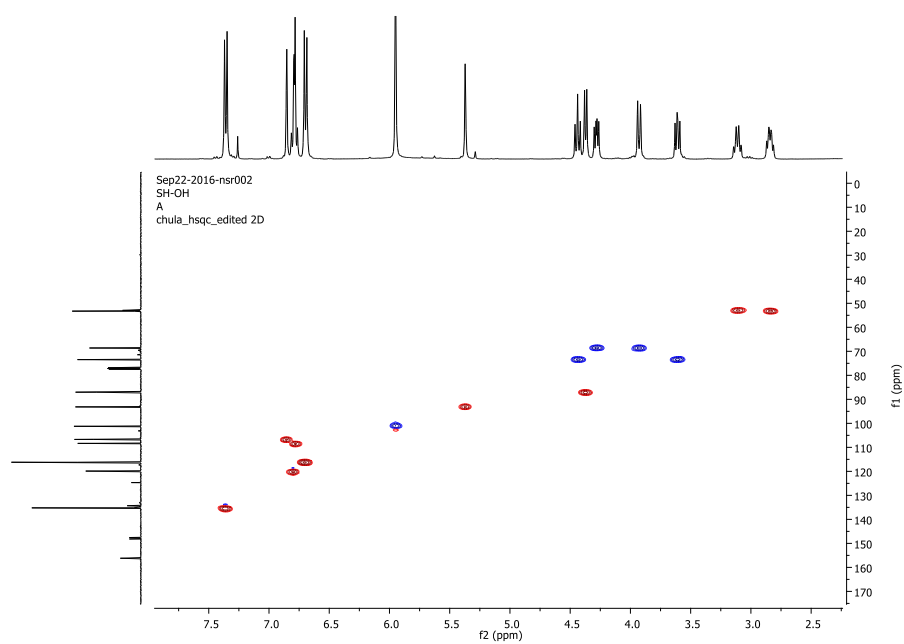

**Figure S14.** HSQC spectrum of **2a-7f** ( $\text{CDCl}_3$ )

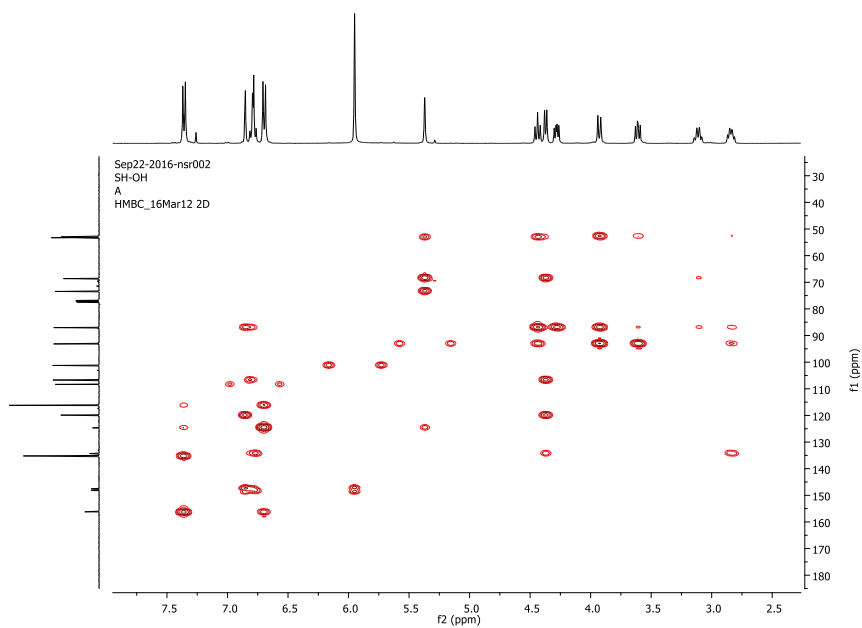

Figure S15. HMBC spectrum of **2a-7f** (CDCl<sub>3</sub>)

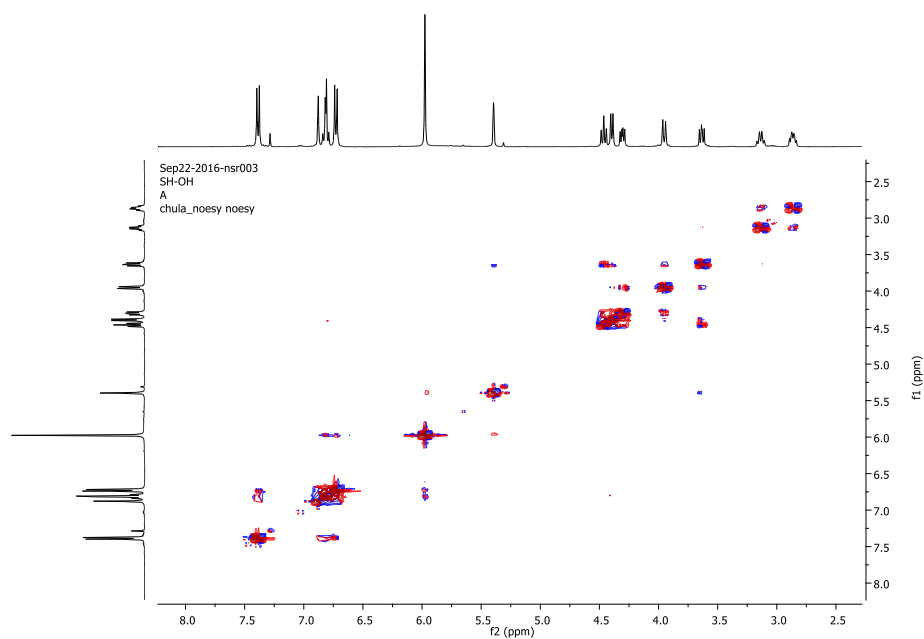

Figure S16. NOESY spectrum of **2a-7f** (CDCl<sub>3</sub>)

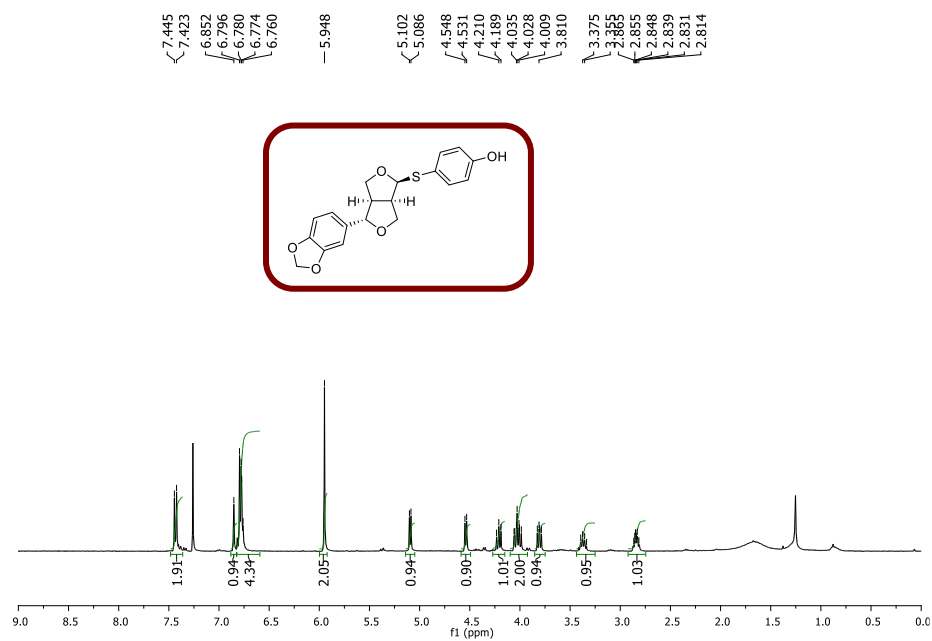

Figure S17. <sup>1</sup>H NMR spectrum of **2β-7f** (CDCl<sub>3</sub>)

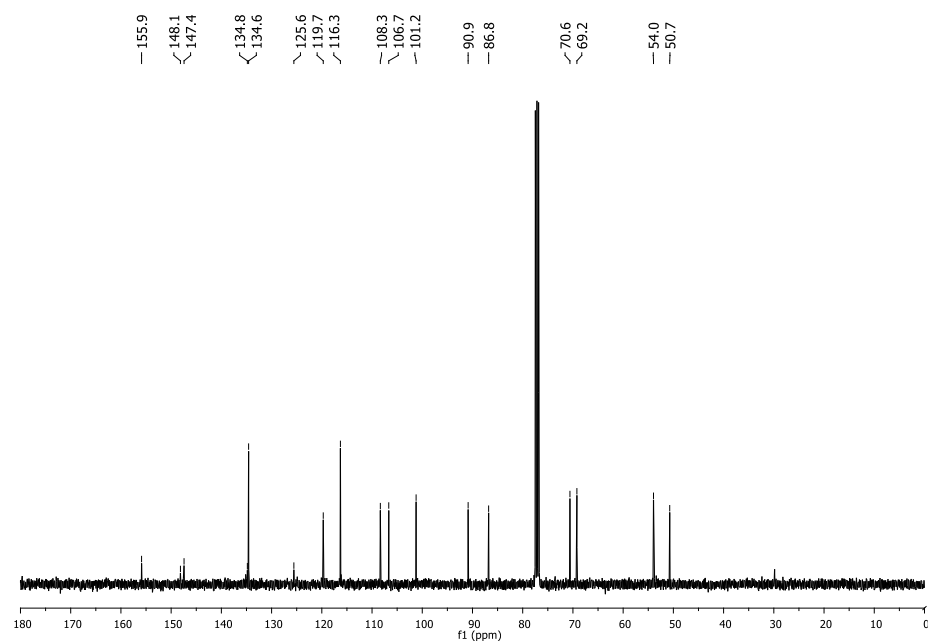

Figure S18. <sup>13</sup>C NMR spectrum of **2β-7f** (CDCl<sub>3</sub>)

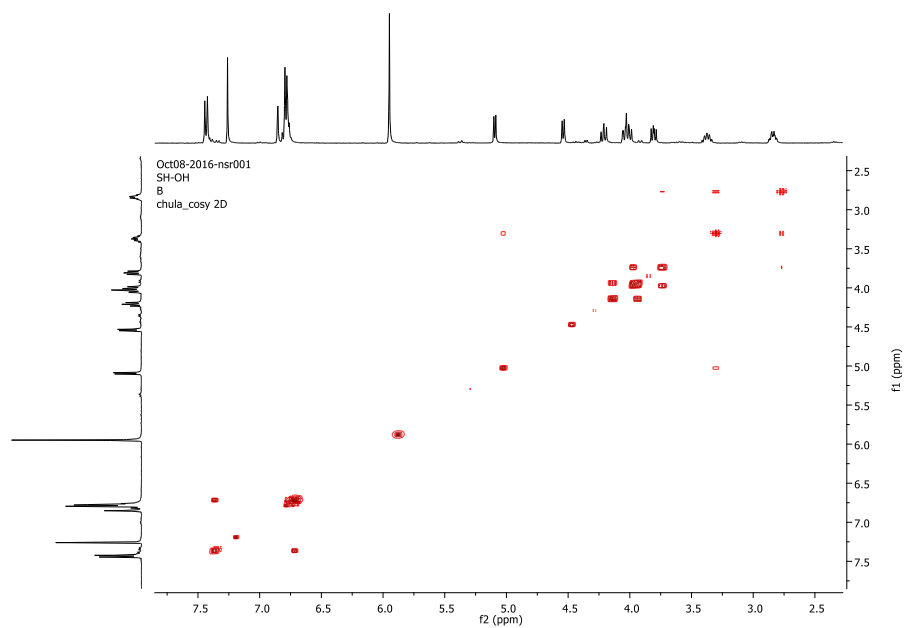

Figure S19. COSY spectrum of **2β-7f** (CDCl<sub>3</sub>)

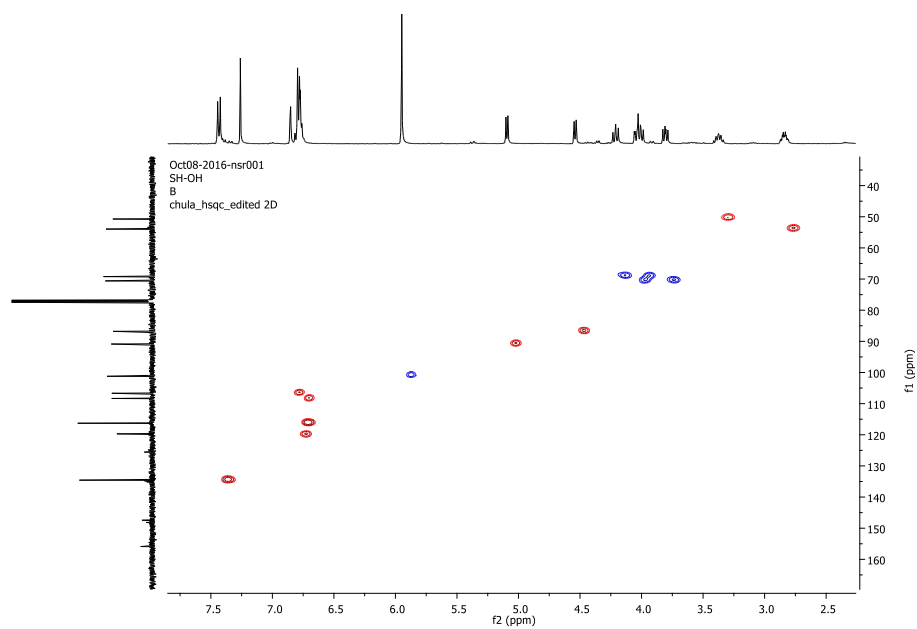

Figure S20. HSQC spectrum of **2β-7f** (CDCl<sub>3</sub>)

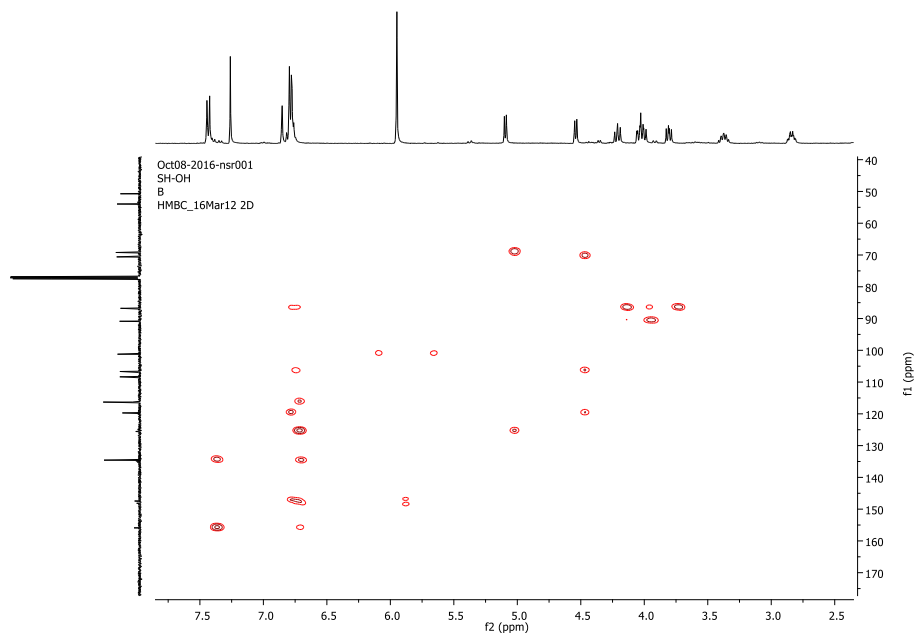

Figure S21. HMBC spectrum of **2β-7f** (CDCl<sub>3</sub>)

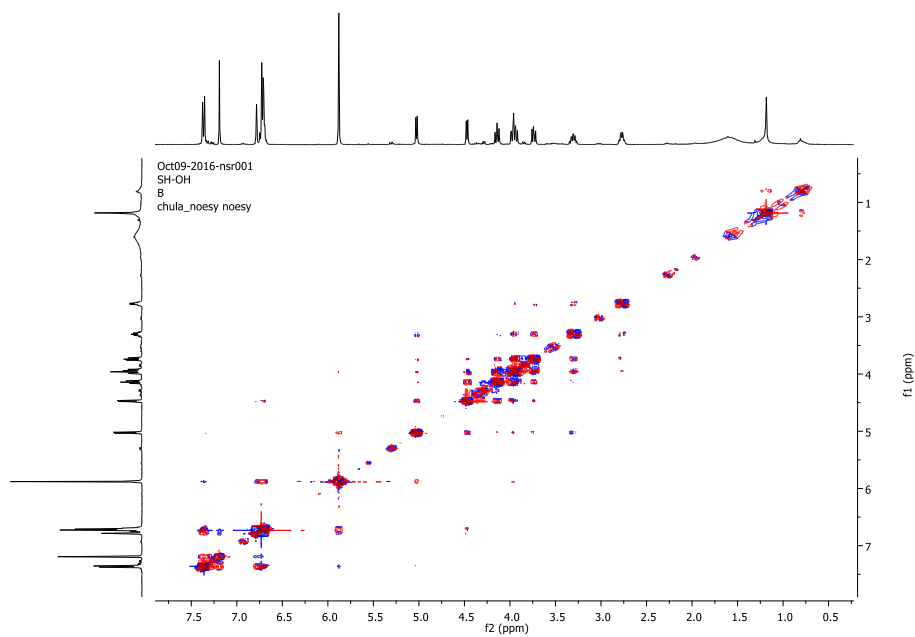

Figure S22. NOESY spectrum of **2β-7f** (CDCl<sub>3</sub>)



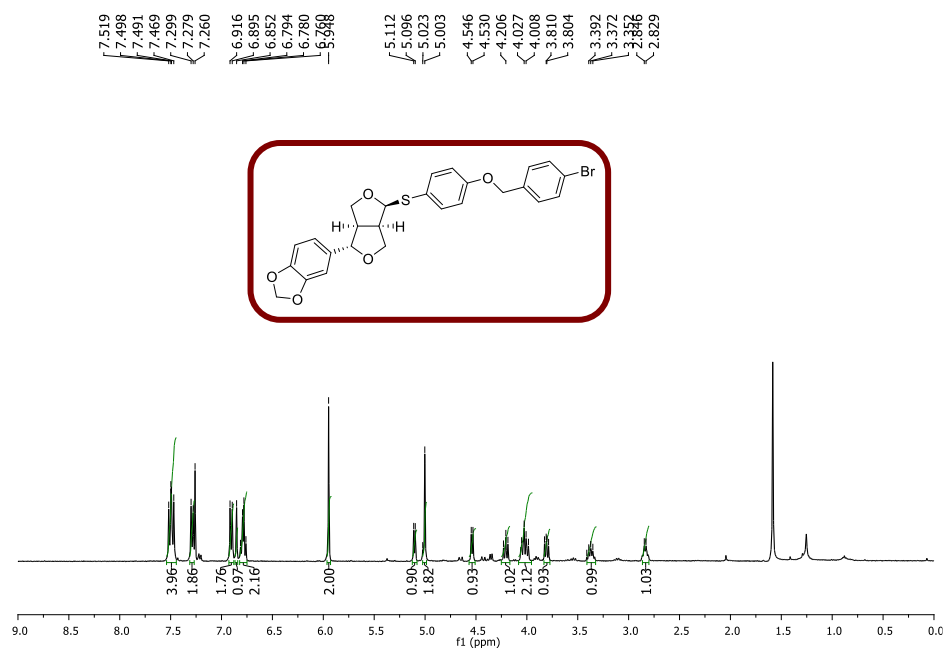

**Figure S23.** <sup>1</sup>H NMR spectrum of **2β-7fBr** (CDCl<sub>3</sub>)

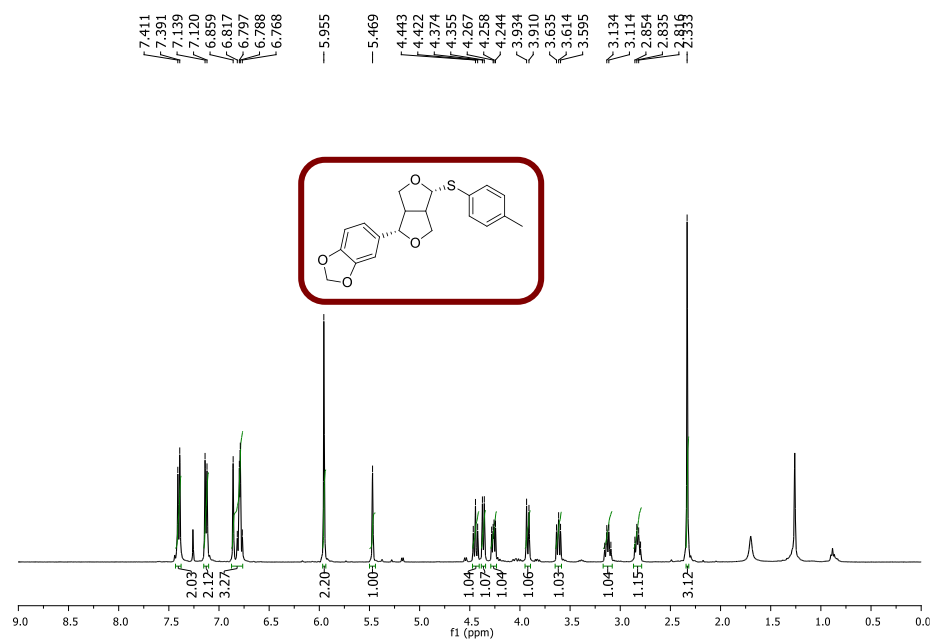

**Figure S24.** <sup>1</sup>H NMR spectrum of **2a-7g** (CDCl<sub>3</sub>)

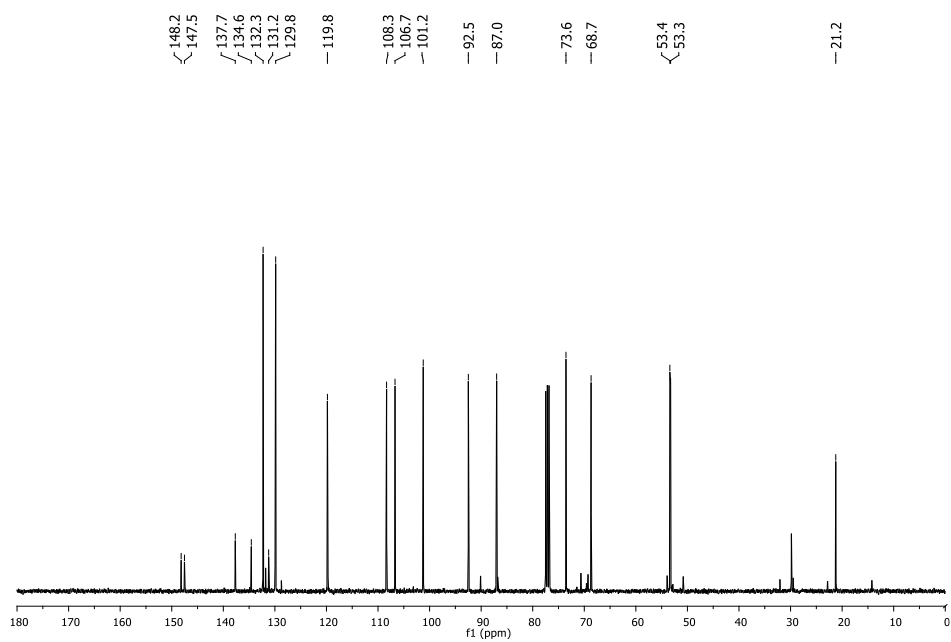

**Figure S25.** <sup>13</sup>C NMR spectrum of **2a-7g** (CDCl<sub>3</sub>)

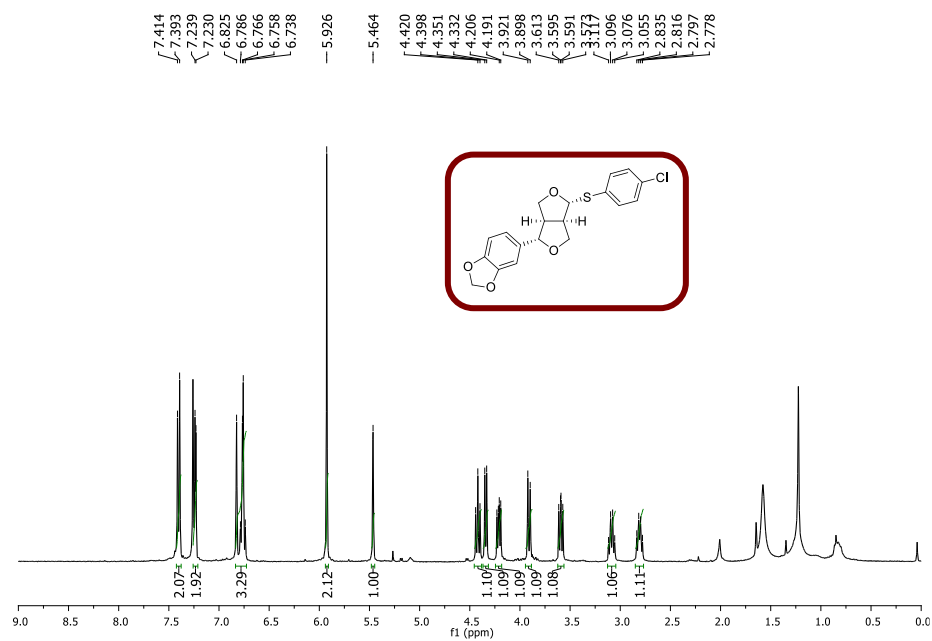

**Figure S26.** <sup>1</sup>H NMR spectrum of **2a-7h** (CDCl<sub>3</sub>)

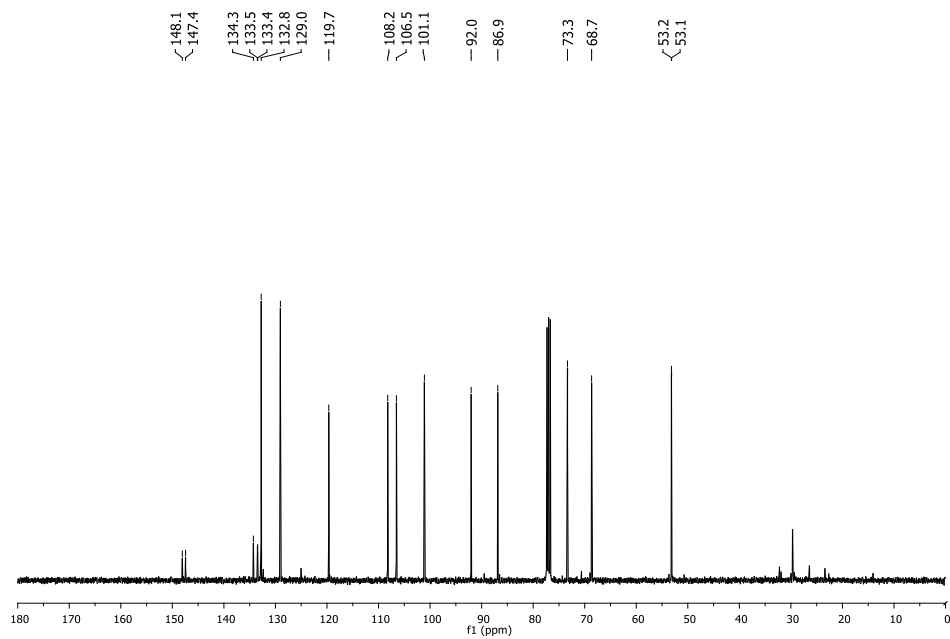

**Figure S27.** <sup>13</sup>C NMR spectrum of **2a-7h** (CDCl<sub>3</sub>)

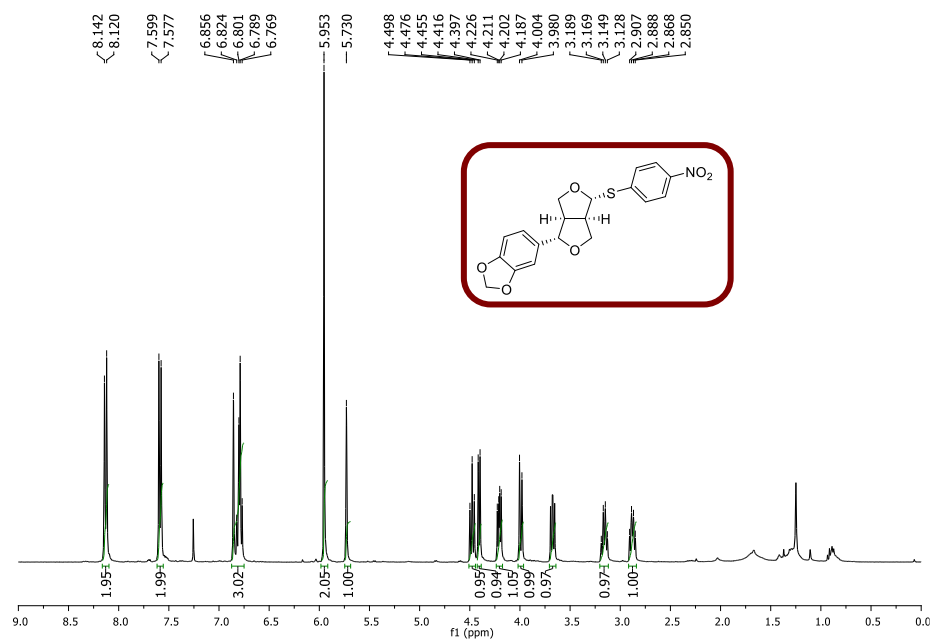

Figure S28. <sup>1</sup>H NMR spectrum of **2a-7i** (CDCl<sub>3</sub>)

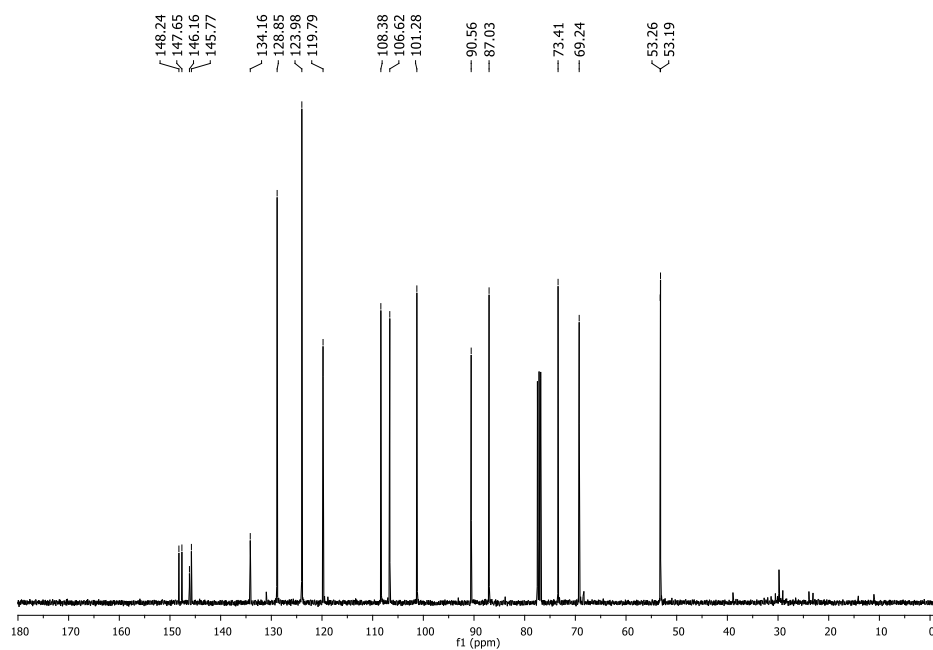

Figure S29. <sup>13</sup>C NMR spectrum of **2a-7i** (CDCl<sub>3</sub>)

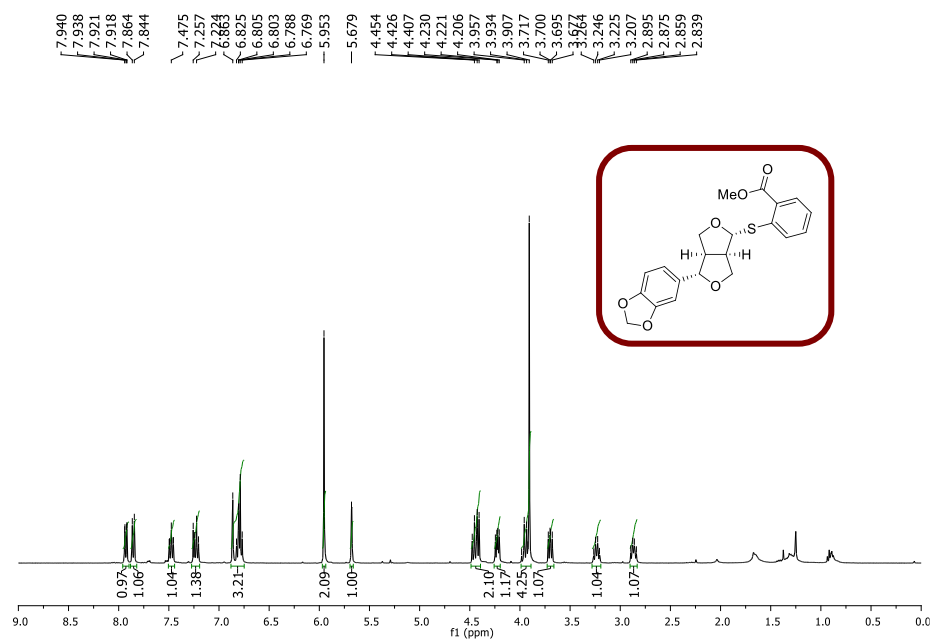

Figure S30. <sup>1</sup>H NMR spectrum of **2a-7j** (CDCl<sub>3</sub>)

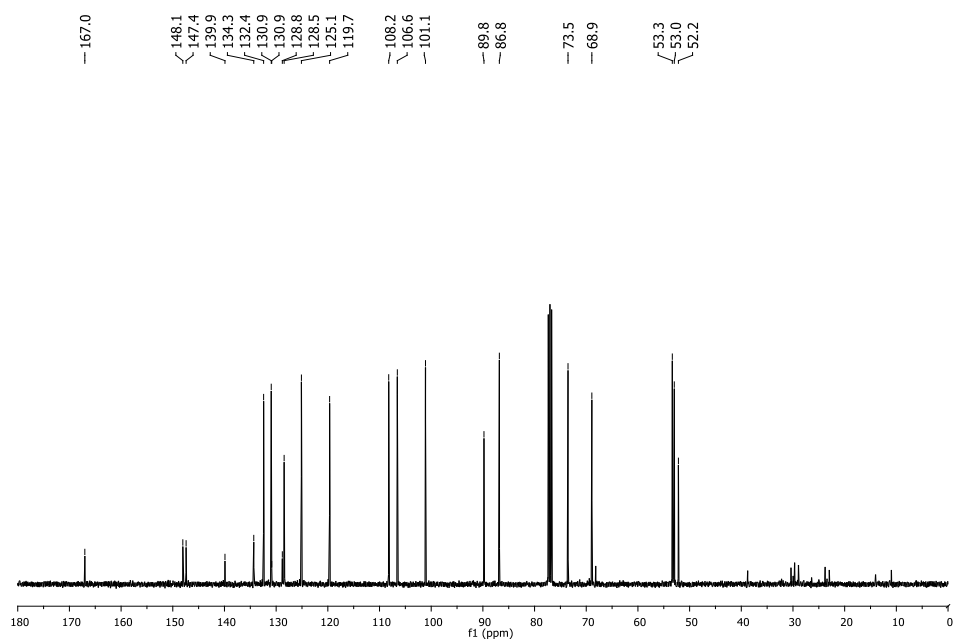

Figure S31. <sup>13</sup>C NMR spectrum of **2a-7j** (CDCl<sub>3</sub>)

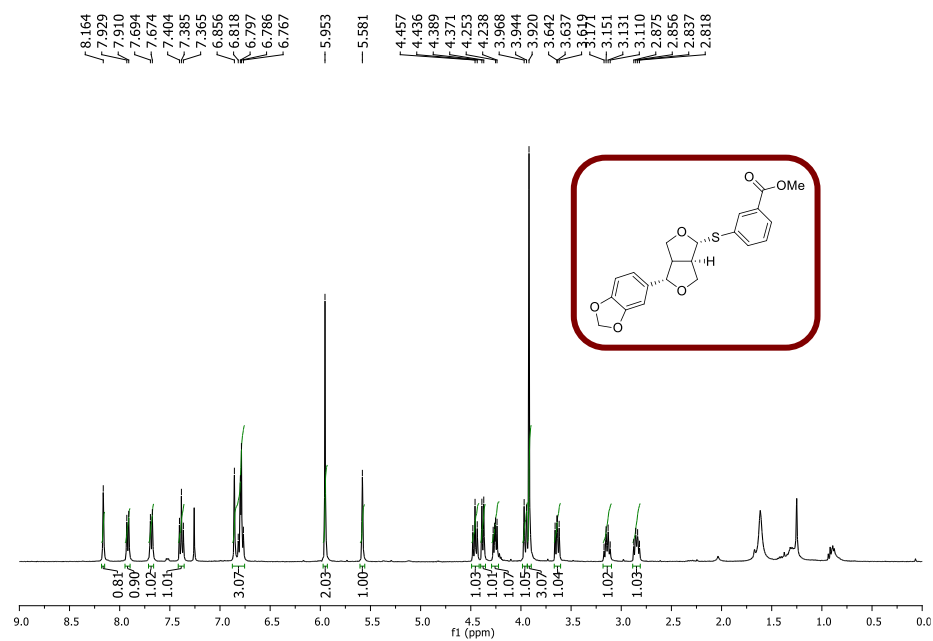

Figure S32. <sup>1</sup>H NMR spectrum of **2a-7k** (CDCl<sub>3</sub>)

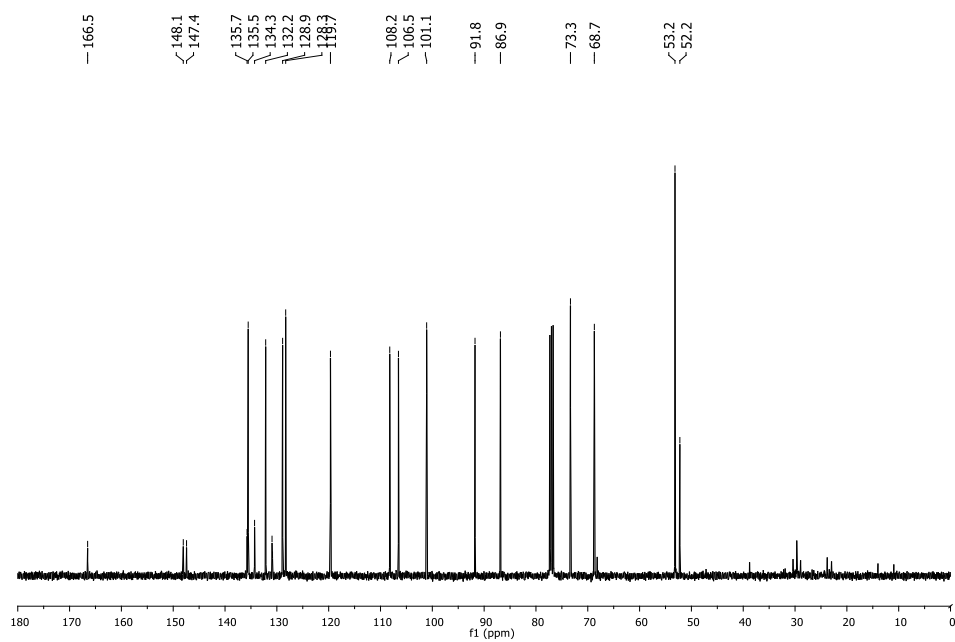

Figure S33. <sup>13</sup>C NMR spectrum of **2a-7k** (CDCl<sub>3</sub>)

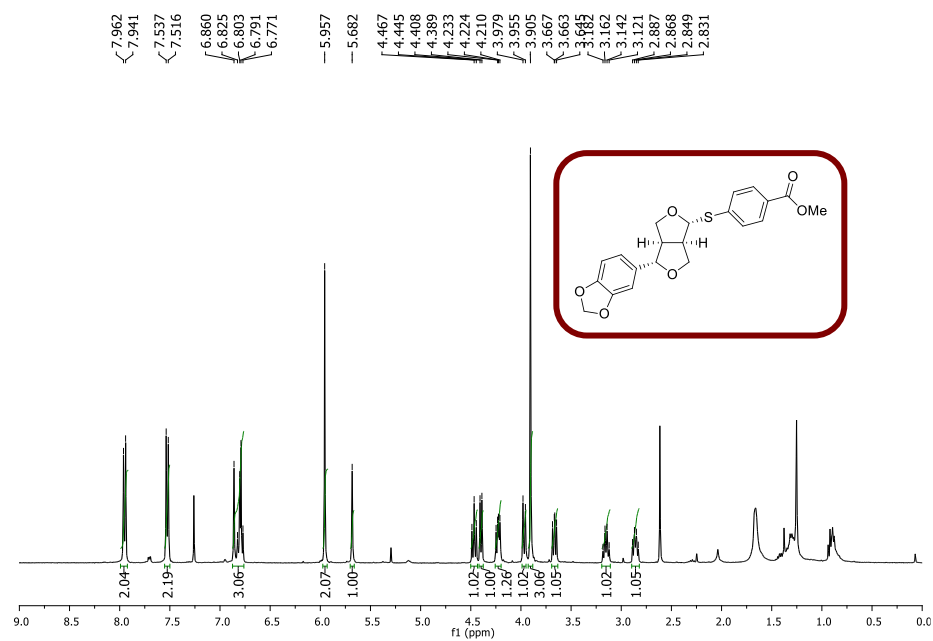

Figure S34. <sup>1</sup>H NMR spectrum of **2a-7l** (CDCl<sub>3</sub>)

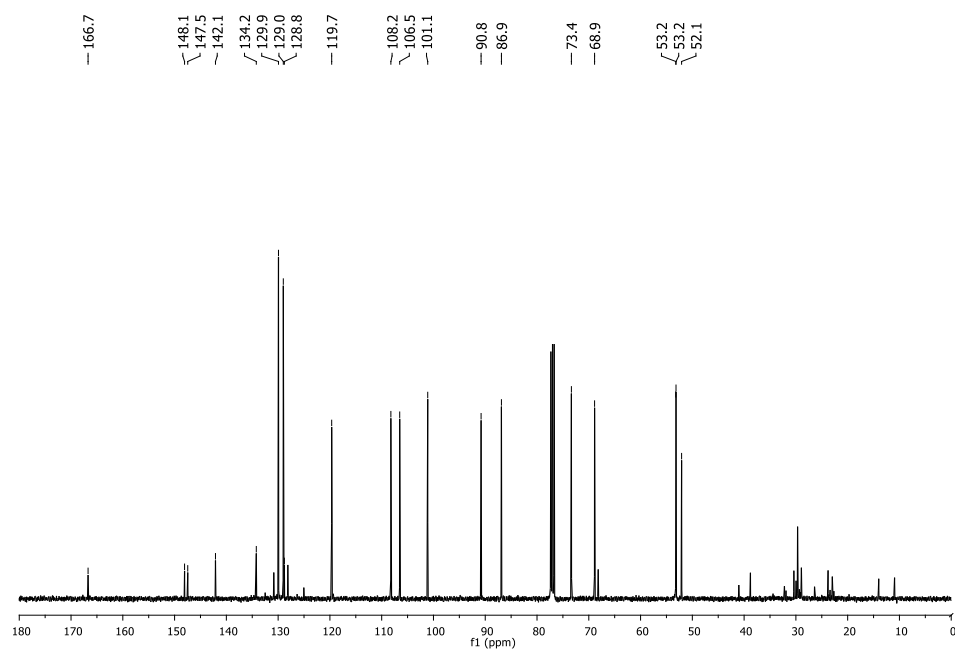

Figure S35. <sup>13</sup>C NMR spectrum of **2a-7l** (CDCl<sub>3</sub>)

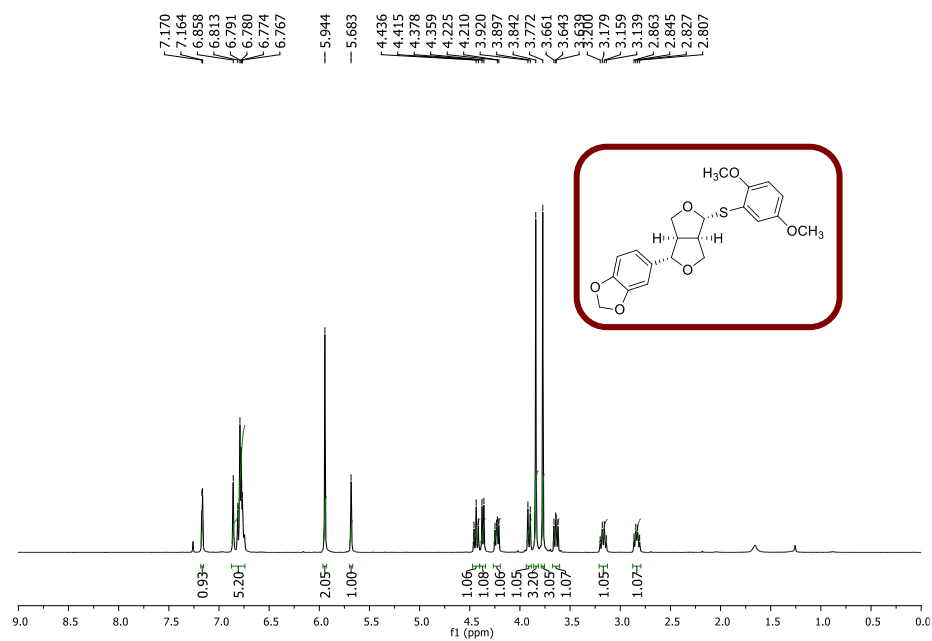

**Figure S36.** <sup>1</sup>H NMR spectrum of **2a-7m** (CDCl<sub>3</sub>)

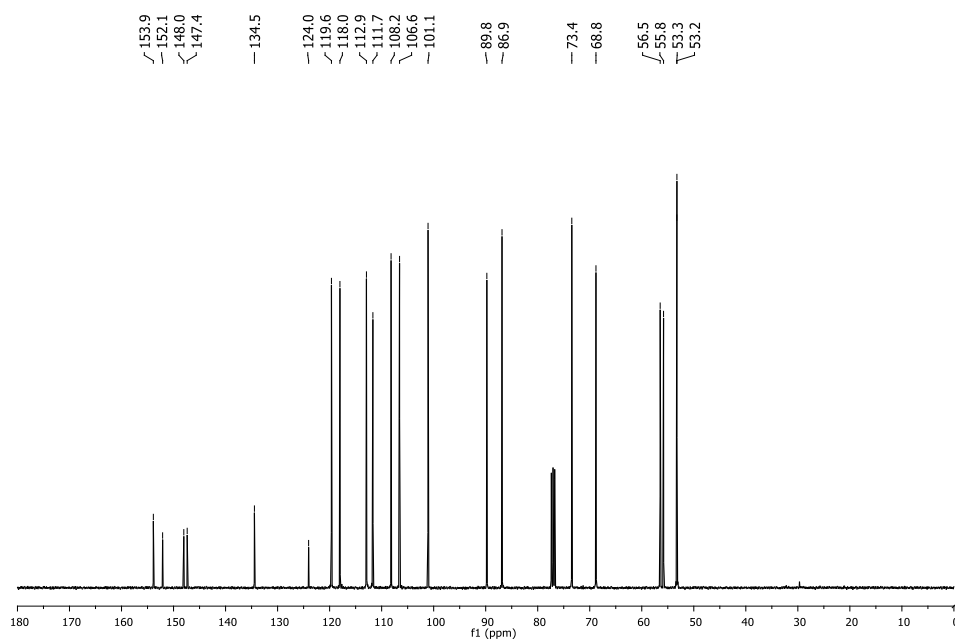

**Figure S37.** <sup>13</sup>C NMR spectrum of **2a-7m** (CDCl<sub>3</sub>)



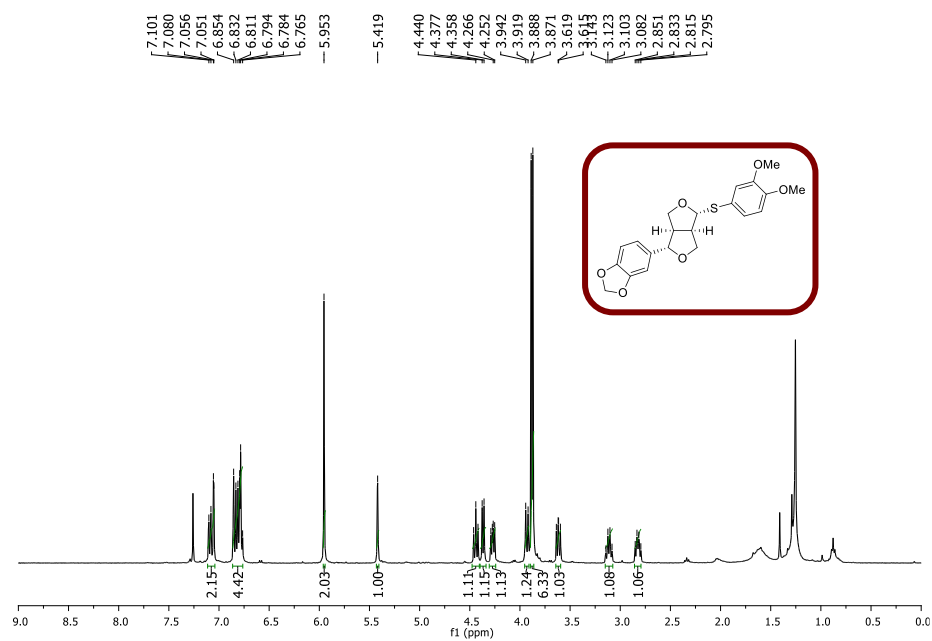

Figure S38. <sup>1</sup>H NMR spectrum of **2a-7n** (CDCl<sub>3</sub>)

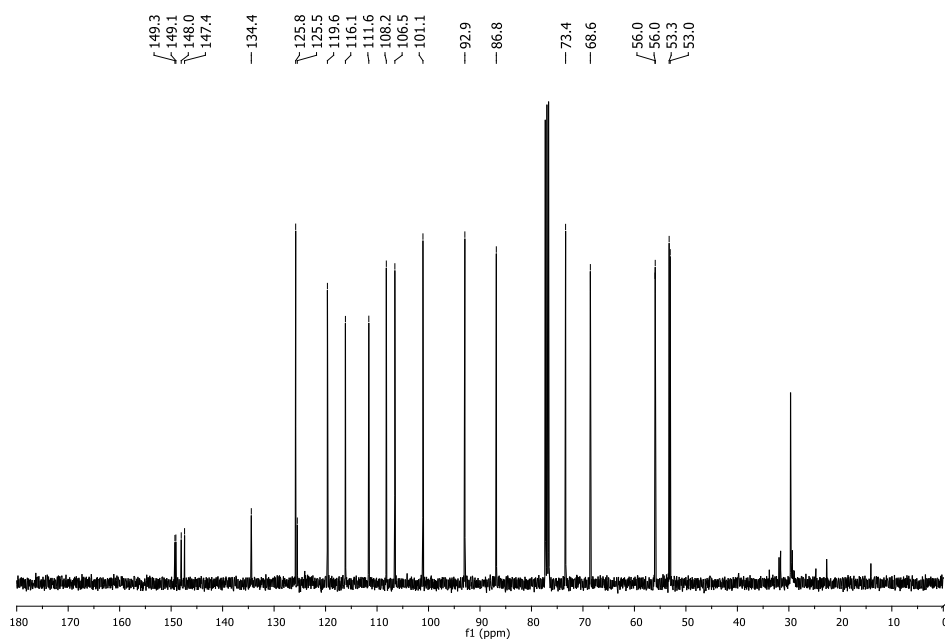

Figure S39. <sup>13</sup>C NMR spectrum of **2a-7n** (CDCl<sub>3</sub>)

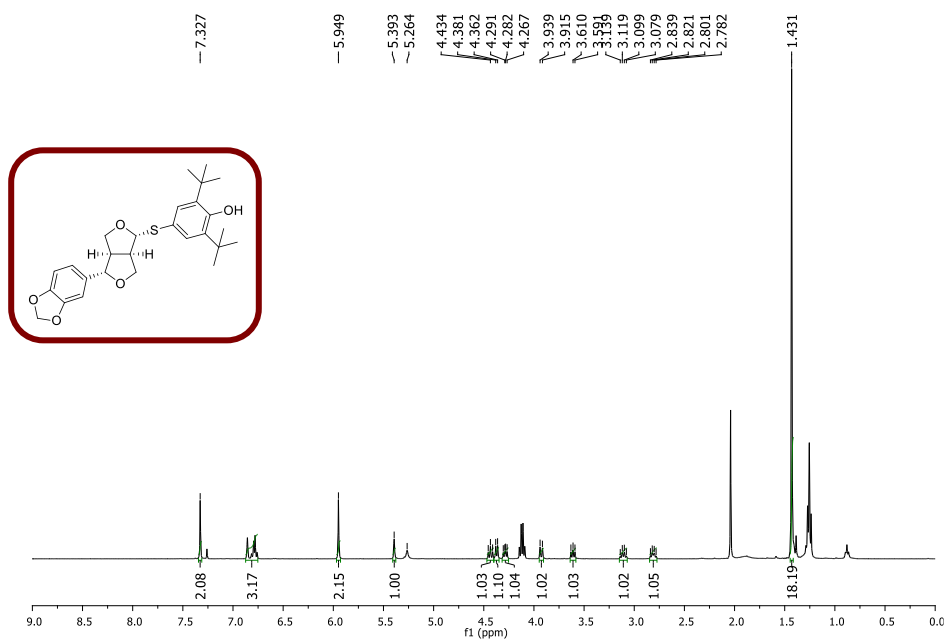

**Figure S40.** <sup>1</sup>H NMR spectrum of **2a-7o** (CDCl<sub>3</sub>)

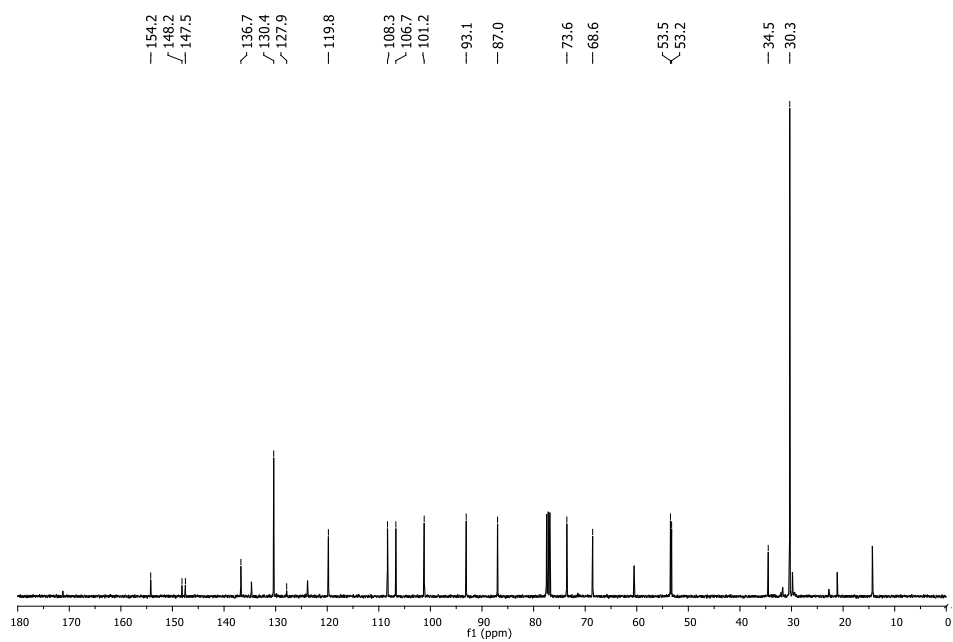

**Figure S41.** <sup>13</sup>C NMR spectrum of **2a-7o** (CDCl<sub>3</sub>)

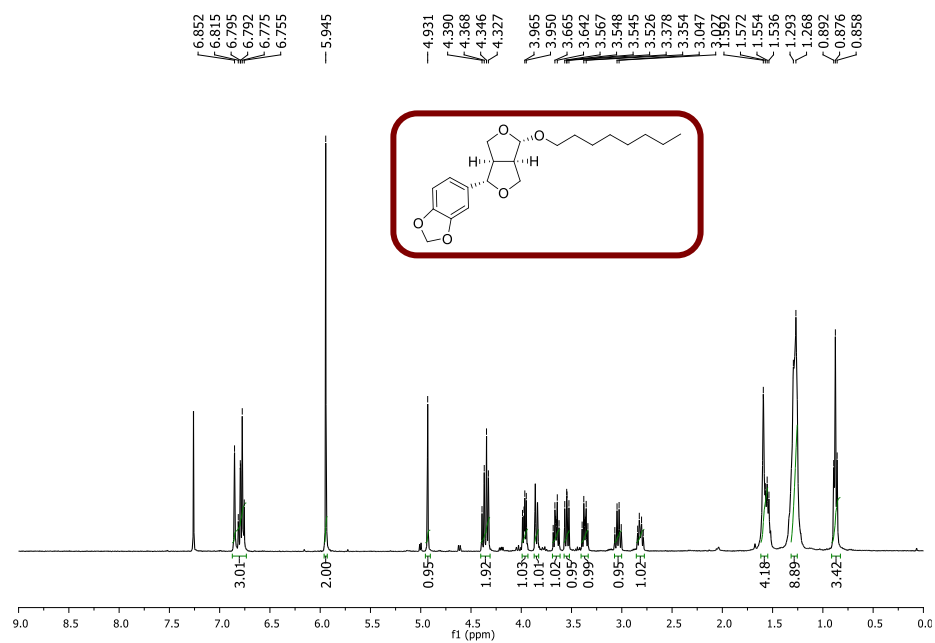

**Figure S42.** <sup>1</sup>H NMR spectrum of **2a-9b** (CDCl<sub>3</sub>)

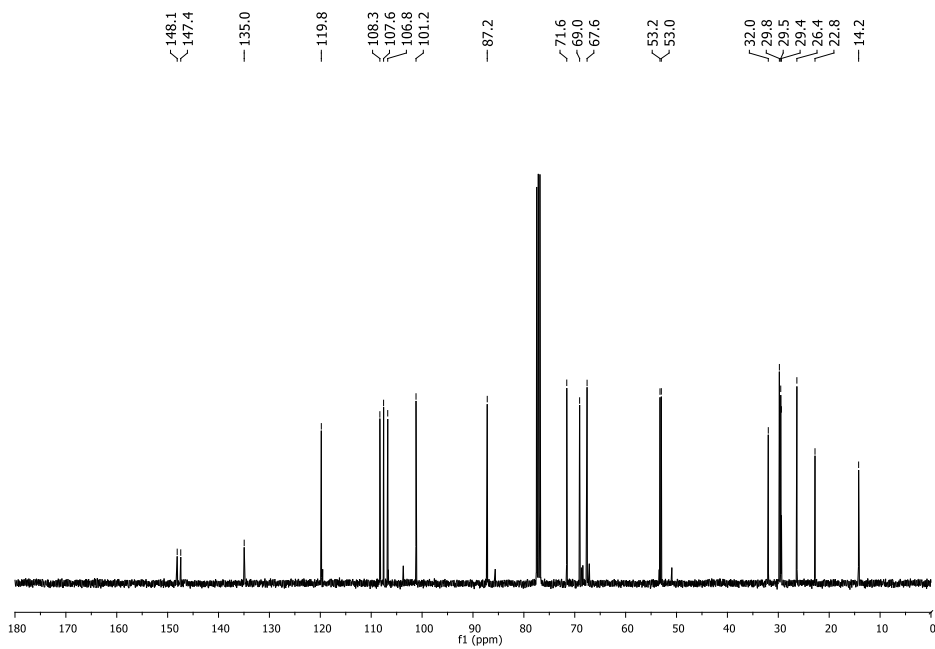

**Figure S43.** <sup>13</sup>C NMR spectrum of **2a-9b** (CDCl<sub>3</sub>)

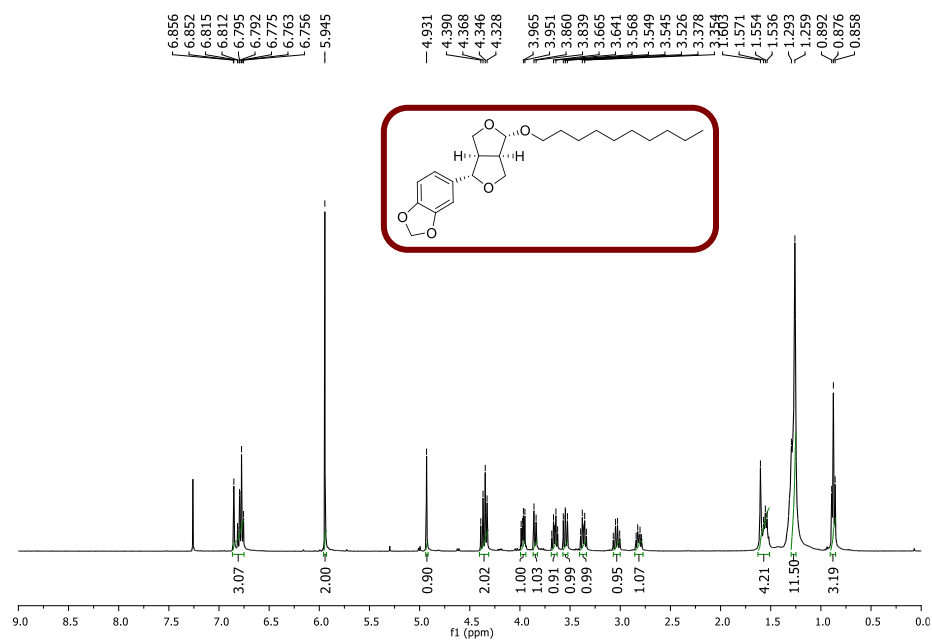

Figure S44. <sup>1</sup>H NMR spectrum of **2a-9c** (CDCl<sub>3</sub>)

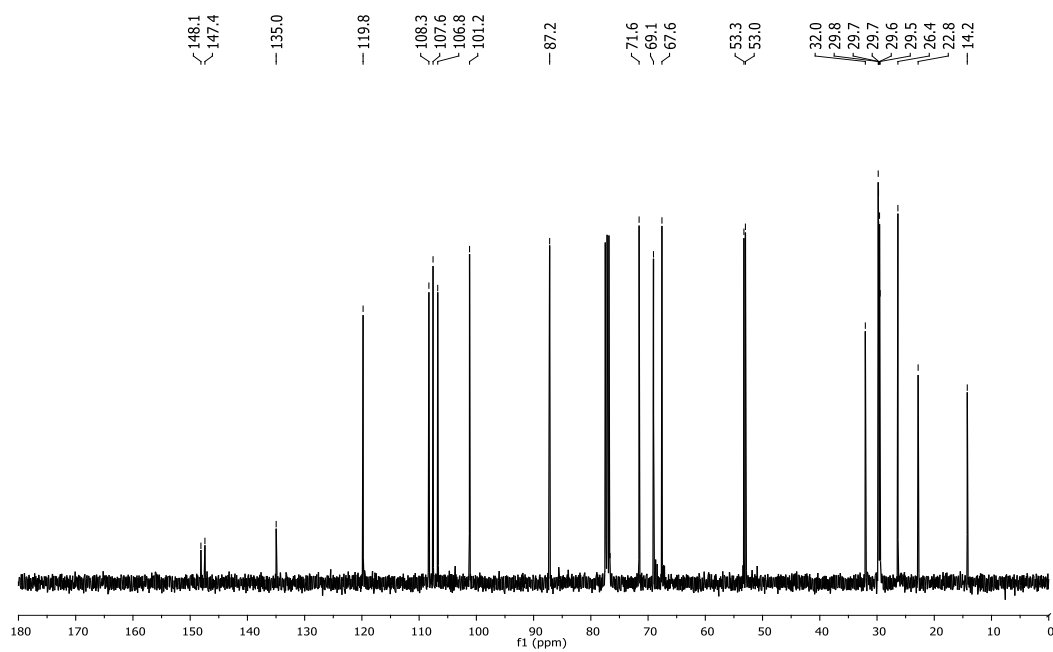

Figure S45. <sup>13</sup>C NMR spectrum of **2a-9c** (CDCl<sub>3</sub>)

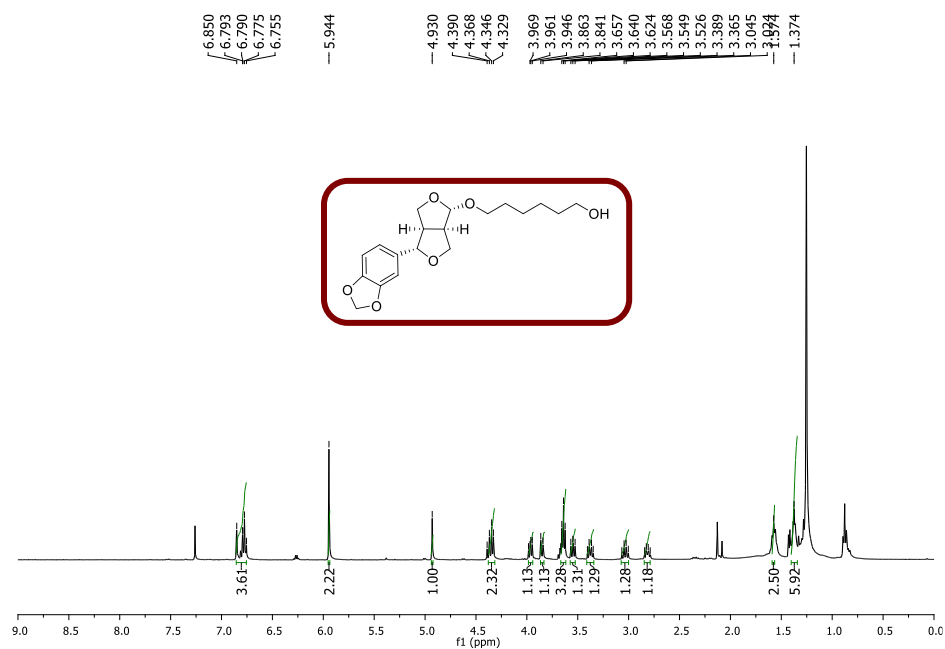

Figure S46. <sup>1</sup>H NMR spectrum of **2a-9d** (CDCl<sub>3</sub>)

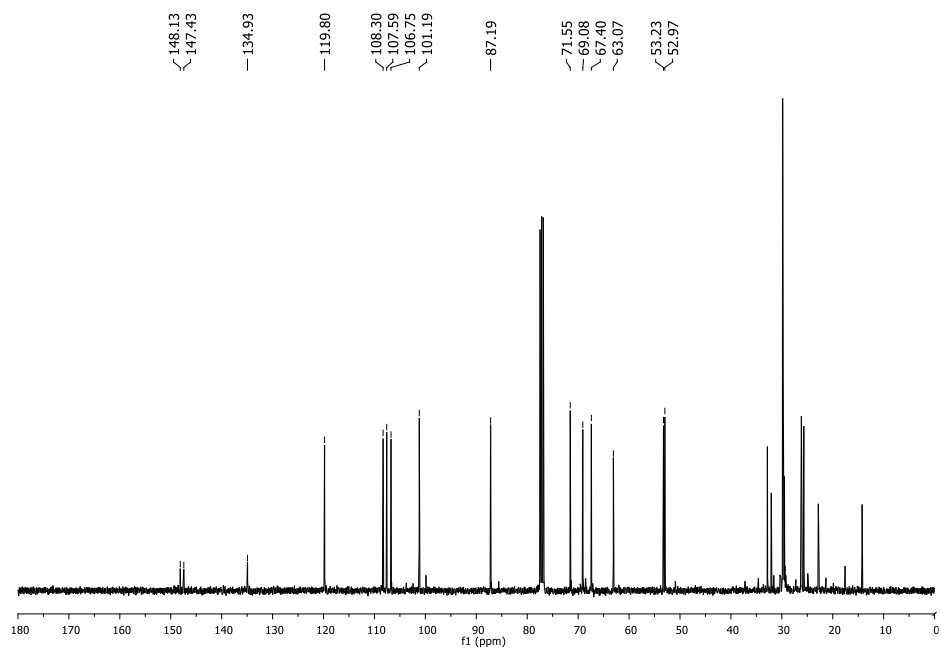

Figure S47. <sup>13</sup>C NMR spectrum of **2a-9d** (CDCl<sub>3</sub>)

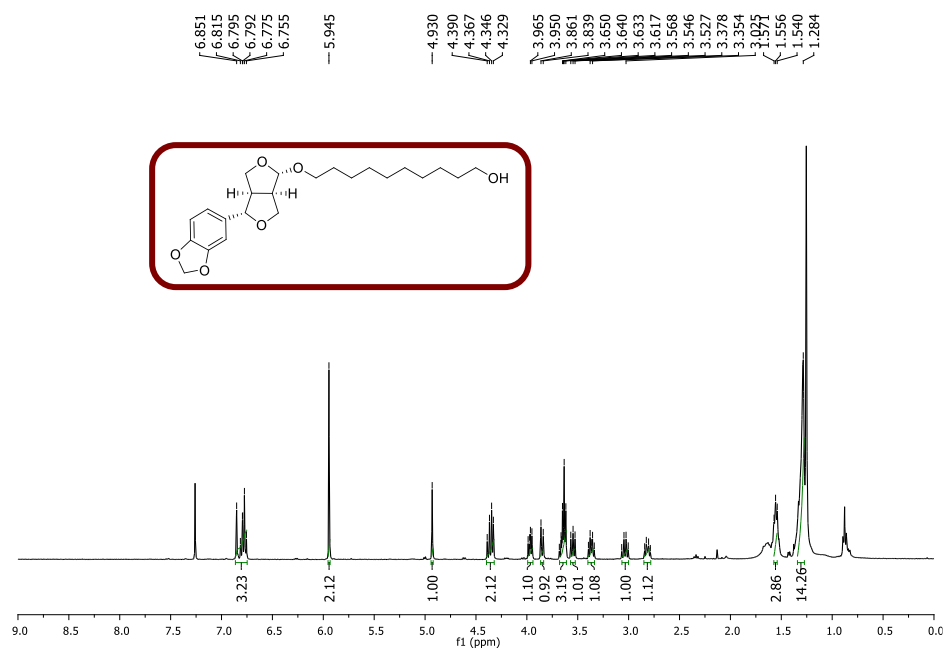

Figure S48. <sup>1</sup>H NMR spectrum of **2β-9e** (CDCl<sub>3</sub>)

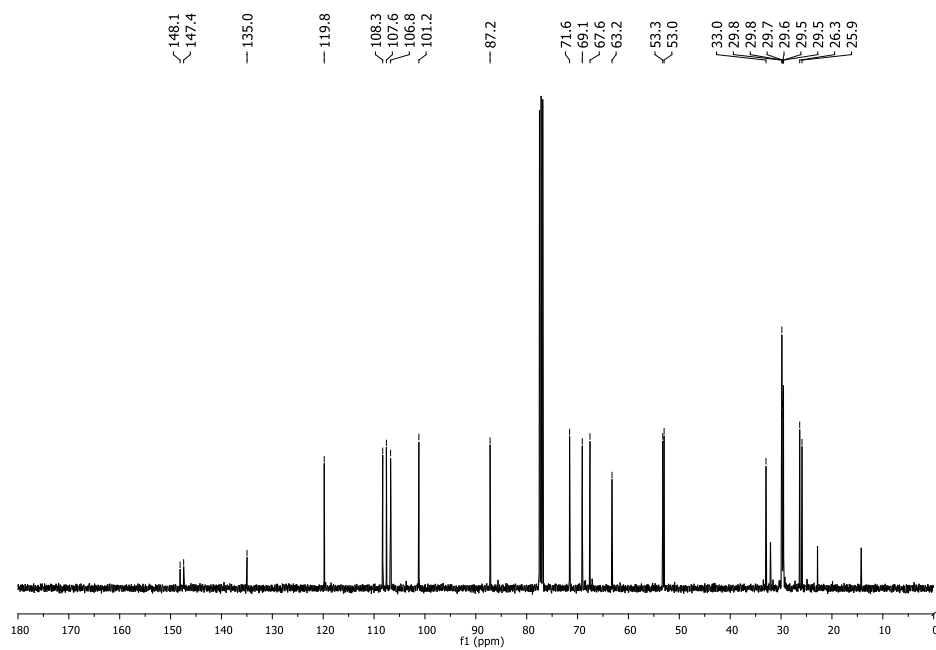

Figure S49. <sup>13</sup>C NMR spectrum of **2β-9e** (CDCl<sub>3</sub>)

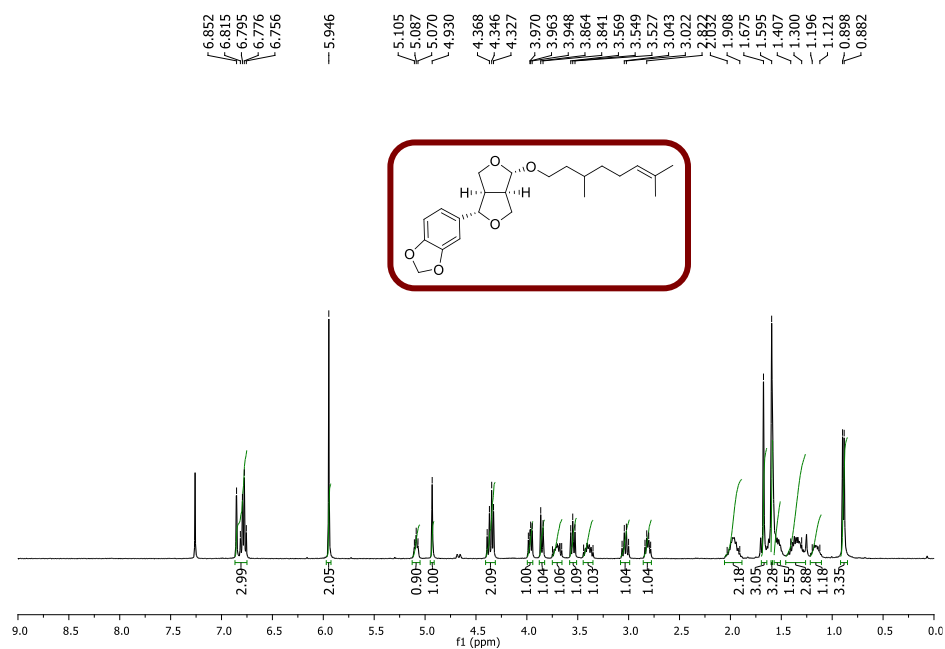Figure S50. <sup>1</sup>H NMR spectrum of **2a-9f** (CDCl<sub>3</sub>)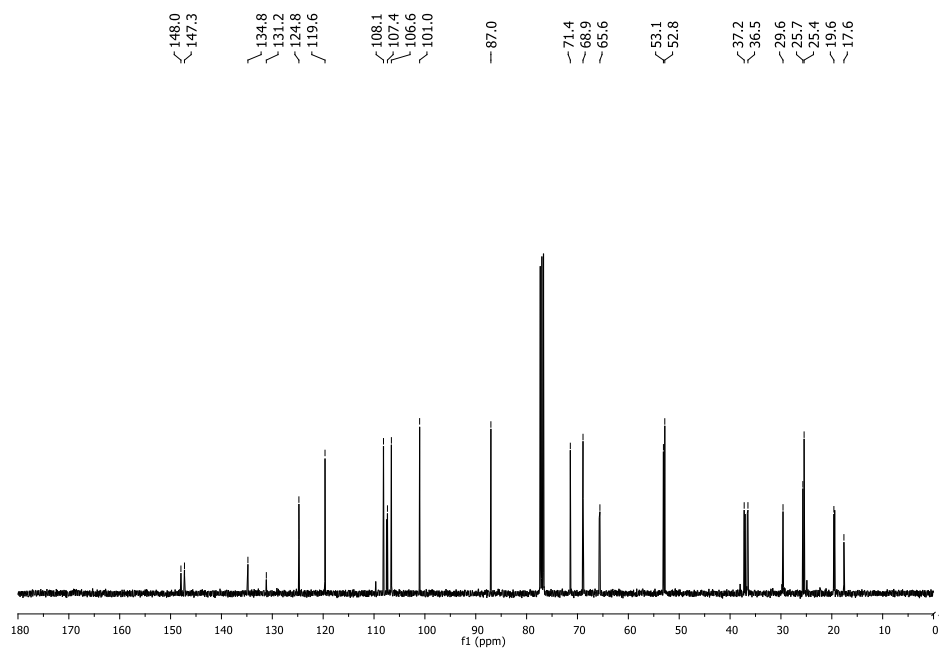Figure S51. <sup>13</sup>C NMR spectrum of **2a-9f** (CDCl<sub>3</sub>)

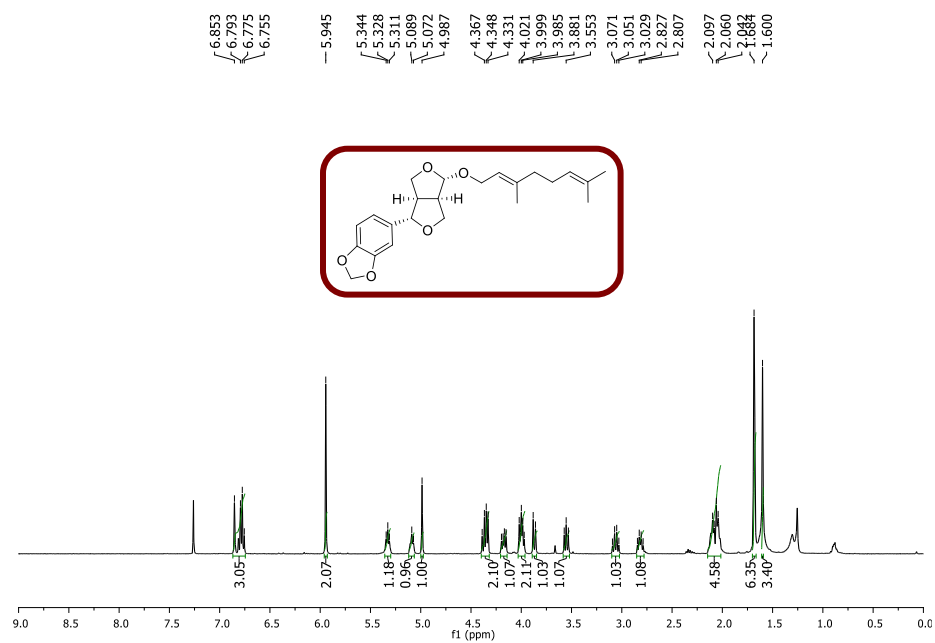

Figure S52. <sup>1</sup>H NMR spectrum of **2a-9g** (CDCl<sub>3</sub>)

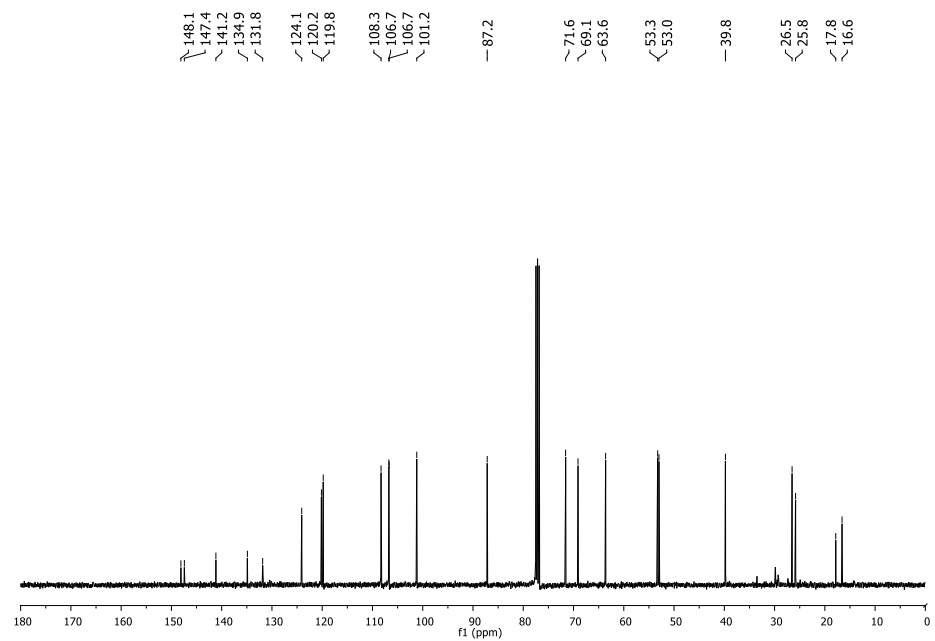

Figure S53. <sup>13</sup>C NMR spectrum of **2a-9g** (CDCl<sub>3</sub>)



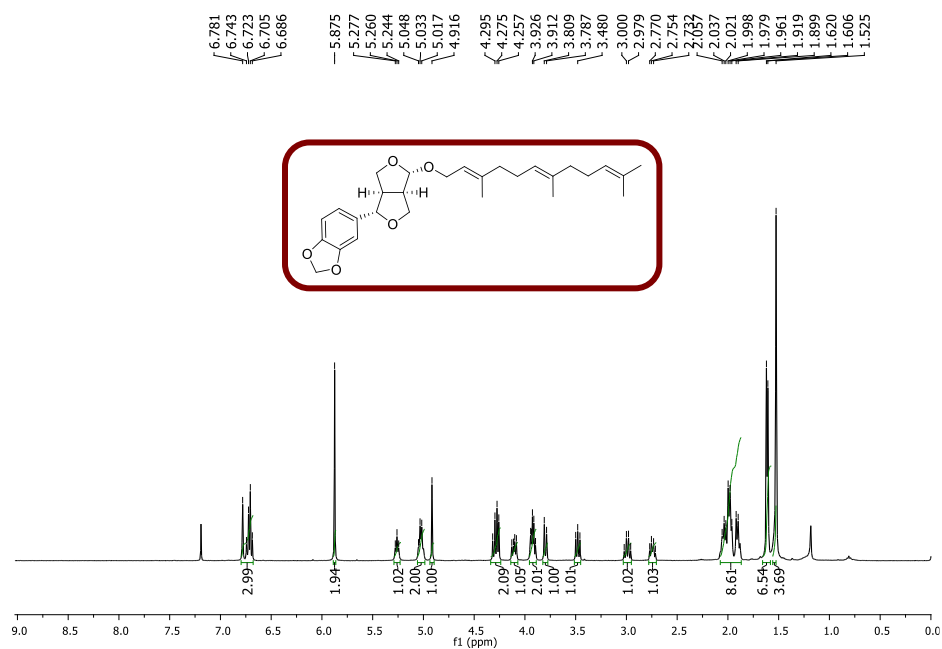

**Figure S54.** <sup>1</sup>H NMR spectrum of **2a-9h** (CDCl<sub>3</sub>)

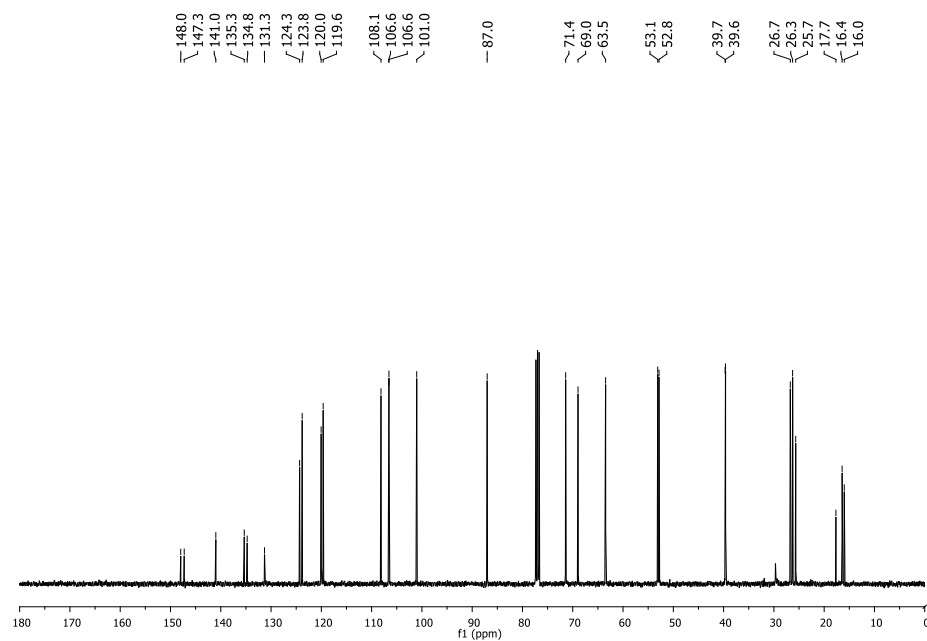

**Figure S55.** <sup>13</sup>C NMR spectrum of **2a-9h** (CDCl<sub>3</sub>)

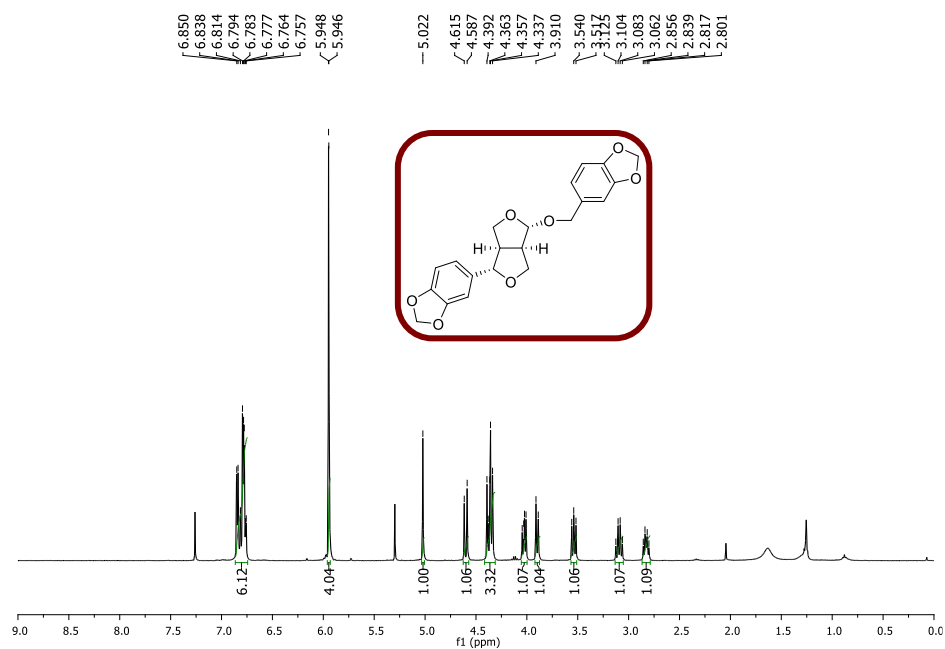

Figure S56. <sup>1</sup>H NMR spectrum of **2a-9i** (CDCl<sub>3</sub>)

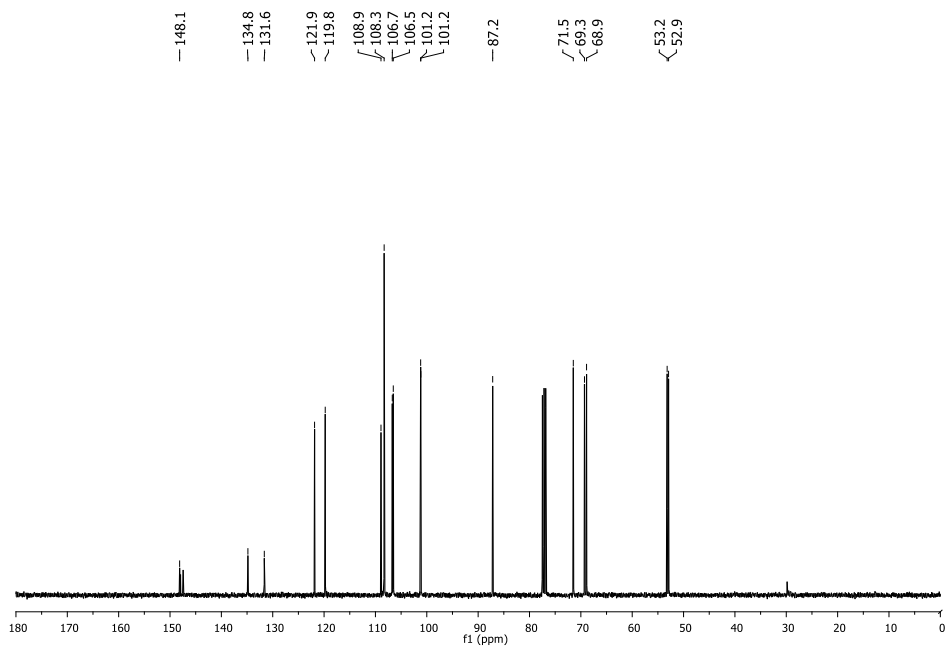

Figure S57. <sup>13</sup>C NMR spectrum of **2a-9i** (CDCl<sub>3</sub>)

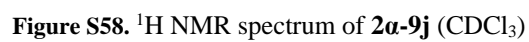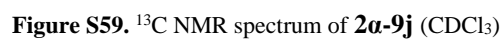

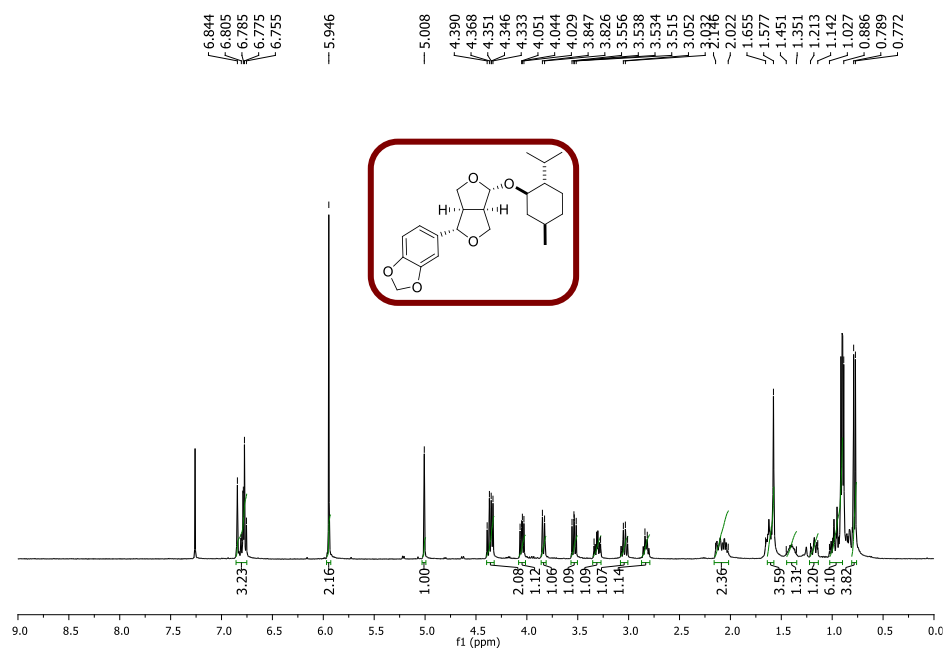

Figure S60. <sup>1</sup>H NMR spectrum of **2a-9k** (CDCl<sub>3</sub>)

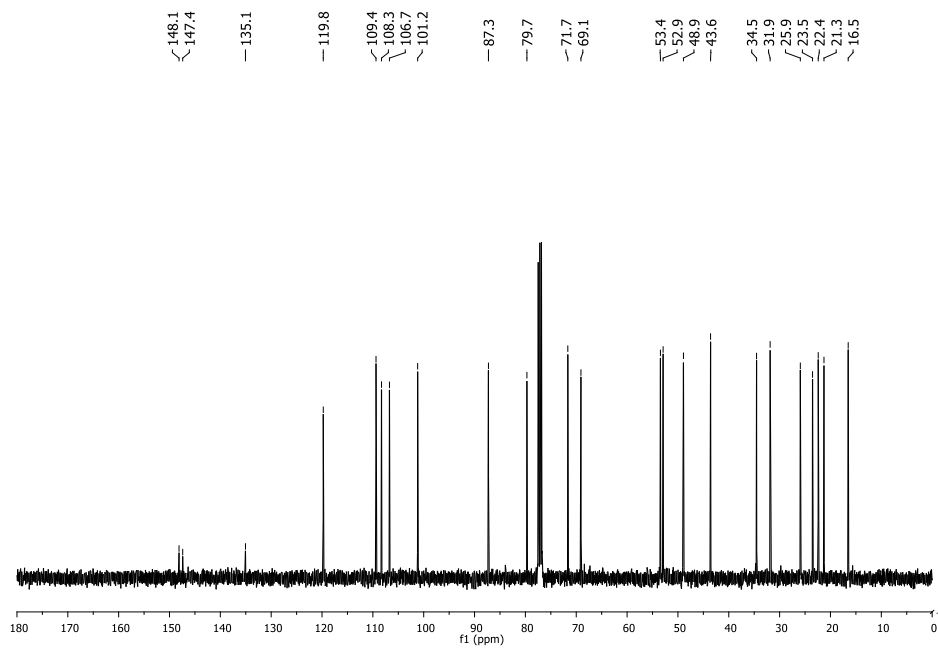

Figure S61. <sup>13</sup>C NMR spectrum of **2a-9k** (CDCl<sub>3</sub>)

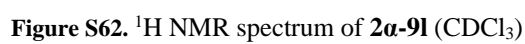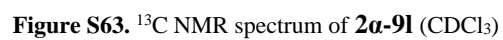

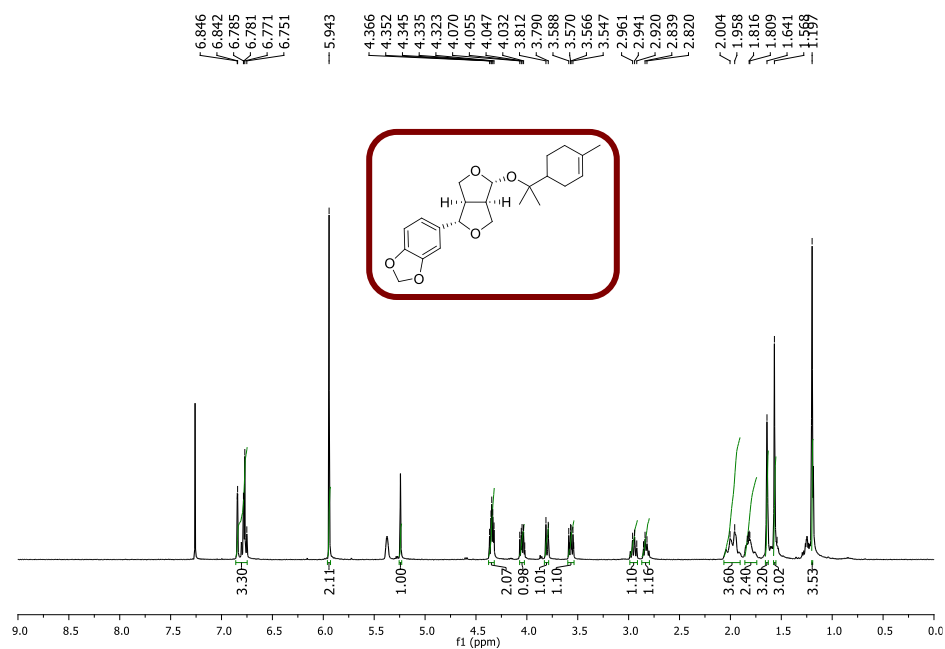

Figure S64. <sup>1</sup>H NMR spectrum of **2a-9m** (CDCl<sub>3</sub>)

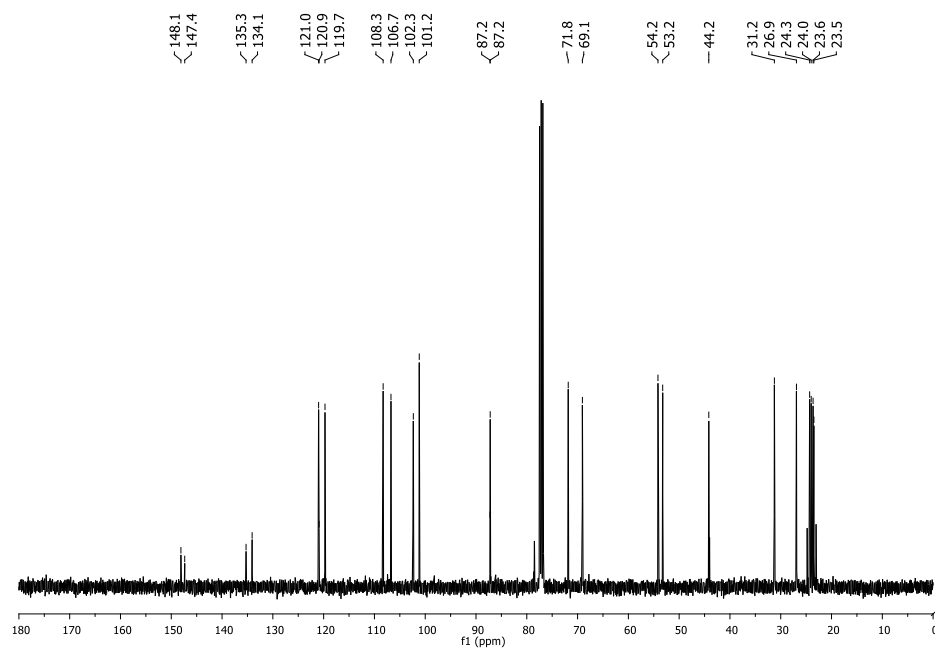

Figure S65. <sup>13</sup>C NMR spectrum of **2a-9m** (CDCl<sub>3</sub>)

**Table S2.** Crystal data and refinement parameters of compounds **2 $\alpha$ -7f** and **2 $\beta$ -7fBr**.

|                                                                                                                | <b>2<math>\alpha</math>-7f</b>                   | <b>2<math>\beta</math>-7fBr</b>                     |
|----------------------------------------------------------------------------------------------------------------|--------------------------------------------------|-----------------------------------------------------|
| Crystal habit                                                                                                  | Thin plate, colorless                            | Thin plate, colorless                               |
| Crystal size (mm <sup>3</sup> )                                                                                | 0.01×0.24×0.34                                   | 0.01×0.18×0.20                                      |
| Empirical formula                                                                                              | C <sub>19</sub> H <sub>18</sub> O <sub>5</sub> S | C <sub>26</sub> H <sub>23</sub> Br O <sub>5</sub> S |
| <i>FW</i>                                                                                                      | 358.40                                           | 527.41                                              |
| Crystal system                                                                                                 | Monoclinic                                       | Triclinic                                           |
| Space group                                                                                                    | <i>P</i> 2 <sub>1</sub> (no. 4)                  | <i>P</i> 1 (no. 1)                                  |
| <i>a</i> [Å]                                                                                                   | 6.1485(2)                                        | 6.7501(13)                                          |
| <i>b</i> [Å]                                                                                                   | 7.6475(2)                                        | 8.8663(18)                                          |
| <i>c</i> [Å]                                                                                                   | 17.9288(4)                                       | 20.864(4)                                           |
| $\alpha$ [°]                                                                                                   | 90                                               | 95.858(5)                                           |
| $\beta$ [°]                                                                                                    | 90.711(1)                                        | 94.023(5)                                           |
| $\gamma$ [°]                                                                                                   | 90                                               | 111.089(5)                                          |
| <i>V</i> [Å <sup>3</sup> ]                                                                                     | 842.96(4)                                        | 1151.3(4)                                           |
| <i>Z</i>                                                                                                       | 2                                                | 2                                                   |
| $\rho_{\text{calcd}}$ [Mg m <sup>-3</sup> ]                                                                    | 1.412                                            | 1.521                                               |
| $\mu$ [mm <sup>-1</sup> ]                                                                                      | 1.948                                            | 1.912                                               |
| <i>F</i> (000)                                                                                                 | 376                                              | 540                                                 |
| Diffractometer                                                                                                 | Bruker X8 Prospector KAPPA<br>CCD                | Bruker X8 APEX II KAPPA<br>CCD                      |
| Radiation ( $\lambda$ , Å)                                                                                     | CuK $\alpha$ (1.54178)                           | MoK $\alpha$ (0.71073)                              |
| Resolution (Å)                                                                                                 | 0.83                                             | 0.83                                                |
| Temperature (K)                                                                                                | 296(2)                                           | 296(2)                                              |
| $2\theta_{\text{max}}$                                                                                         | 136.8                                            | 50.6                                                |
| Completeness (%)                                                                                               | 99.6                                             | 99.7                                                |
| Reflns collected/<br>unique/ > 2 $\sigma$ ( <i>I</i> )                                                         | 6974 / 3010 / 2417                               | 20477 / 8319 / 3229                                 |
| <i>R</i> <sub>int</sub>                                                                                        | 0.0522                                           | 0.0943                                              |
| Data / parameters                                                                                              | 3010 / 227                                       | 8319 / 595                                          |
| Goodness on fit                                                                                                | 1.100                                            | 0.921                                               |
| <i>R</i> <sub>1</sub> , <sup>a</sup> <i>wR</i> <sub>2</sub> <sup>b</sup> [ <i>I</i> > 2 $\sigma$ ( <i>I</i> )] | 0.0558, 0.1403                                   | 0.0584, 0.0827                                      |
| <i>R</i> <sub>1</sub> , <i>wR</i> <sub>2</sub> [all data]                                                      | 0.0672, 0.1535                                   | 0.2047, 0.1200                                      |
| Flack parameter ( <i>x</i> )                                                                                   | 0.040(19)                                        | 0.026(12)                                           |
| $\Delta\rho$ (e Å <sup>-3</sup> )                                                                              | -0.39, 0.21                                      | -0.28, 0.28                                         |

<sup>a</sup>  $R = \sum ||F_o| - |F_c|| / \sum |F_o|$ ; <sup>b</sup>  $wR = \sum \{w(F_o^2 - F_c^2)^2 / \sum w(F_o^2)^2\}^{1/2}$ .
